# Supplementary material for: Genetic parameters of growth and adaptive traits in aspen (Populus tremuloides): Implications for tree breeding in a warming world
Source: PLoS One. 2020 Mar 3;15(3):e0229225. doi: 10.1371/journal.pone.0229225 (PMC7053761; doi:10.1371/journal.pone.0229225)
Supplement: S1 Dataset — A data table in comma separated values (CSV) format, containing phenology data for Trials 2, 3, and 8. The first 14 rows contain descriptions of the variables. (CSV) [file pone.0229225.s001.csv]

VARIABLE EXPLANATION
SITE_NO		Site number corresponding to Table 1 and Figure 1
MAIN_BLOCK		Main block of experimental design that contains all treatments (complete block)
ALPHA_BLOCK		Alpha block of experimental design within main block that contains a subset of treatments (incomplete block)
TREE_POSITION		Numbered tree position corresponding to numbered stakes in the field trials
FAMILY		An identification number for offspring with the same male and female parents
CLONE		An identification number for clonally replicated individuals
TREATMENT		A treatment number that corresponds to a clone or a family if not clonally replicated
BUD_BREAK_3		The day of year where budbreak reached a score of 3 (see methods for scoring system)
LEAF_SENESCENCE_7		The day of year where leaf senescence reached a score of 7 (see methods for scoring system)
DATA TABLE IN COMMA SEPARATED VALUES (CSV) FORMAT
SITE_NO	MAIN_BLOCK	ALPHA_BLOCK	TREE_POSITION	FAMILY	CLONE	TREATMENT	BUD_BREAK_3	LEAF_SENESCENCE_7
TRIAL8	MB1	AB1	57	FAM288	C2883	2883	137	293
TRIAL8	MB1	AB1	58	FAM108	C1088	1088	148	272
TRIAL8	MB1	AB1	61	FAM289	C2894	2894	135	288
TRIAL8	MB1	AB1	62	FAM262	C2623	2623	138
TRIAL8	MB1	AB1	109	FAM286	C2864	2864	138	293
TRIAL8	MB1	AB1	110	FAM279	C2792	2792	140	278
TRIAL8	MB1	AB2	117	FAM201	C2012	2012	137	293
TRIAL8	MB1	AB2	118	FAM100	C1006	1006	136
TRIAL8	MB1	AB2	157	FAM300	C3004	3004	137
TRIAL8	MB1	AB2	158	FAM203	C2038	2038	139
TRIAL8	MB1	AB2	169	FAM262	C2622	2622	140	286
TRIAL8	MB1	AB2	170	FAM180	C1808	1808	136	278
TRIAL8	MB1	AB3	119	FAM144	C1443	1443	138	288
TRIAL8	MB1	AB3	120	FAM180	C1802	1802	115	293
TRIAL8	MB1	AB3	155	FAM112	C1127	1127	137	293
TRIAL8	MB1	AB3	156	FAM285	C2851	2851	135	293
TRIAL8	MB1	AB3	171	FAM301	C3014	3014	153
TRIAL8	MB1	AB3	172	FAM135	C1353	1353	136	288
TRIAL8	MB1	AB4	53	FAM300	C3005	3005	140
TRIAL8	MB1	AB4	54	FAM104	C1043	1043	148	286
TRIAL8	MB1	AB4	65	FAM201	C2013	2013	140	272
TRIAL8	MB1	AB4	66	FAM110	C1104	1104	137	288
TRIAL8	MB1	AB4	105	FAM102	C1028	1028	135	288
TRIAL8	MB1	AB4	106	FAM101	C1011	1011	137	272
TRIAL8	MB1	AB5	55	FAM112	C1121	1121	148	272
TRIAL8	MB1	AB5	56	FAM273	C2732	2732	138
TRIAL8	MB1	AB5	63	FAM242	C2424	2424	141
TRIAL8	MB1	AB5	64	FAM102	C1021	1021	140	286
TRIAL8	MB1	AB5	107	FAM145	C1451	1451	128
TRIAL8	MB1	AB5	108	FAM110	C1101	1101	139	272
TRIAL8	MB1	AB6	113	FAM286	C2862	2862	90
TRIAL8	MB1	AB6	114	FAM279	C2798	2798
TRIAL8	MB1	AB6	161	FAM285	C2853	2853	137	293
TRIAL8	MB1	AB6	162	FAM202	C2026	2026	157	293
TRIAL8	MB1	AB6	165	FAM135	C1354	1354	137	278
TRIAL8	MB1	AB6	166	FAM202	C2024	2024	137
TRIAL8	MB1	AB7	115	FAM203	C2031	2031	136
TRIAL8	MB1	AB7	116	FAM147	C1471	1471	151
TRIAL8	MB1	AB7	159	FAM148	C1483	1483	140	288
TRIAL8	MB1	AB7	160	FAM289	C2897	2897	140	286
TRIAL8	MB1	AB7	167	FAM107	C1072	1072	179	272
TRIAL8	MB1	AB7	168	FAM288	C2885	2885	139	293
TRIAL8	MB1	AB8	51	FAM108	C1086	1086	137	288
TRIAL8	MB1	AB8	52	FAM101	C1017	1017	136	293
TRIAL8	MB1	AB8	67	FAM177	C1777	1777	127
TRIAL8	MB1	AB8	68	FAM293	C2932	2932	136
TRIAL8	MB1	AB8	103			3149	135
TRIAL8	MB1	AB8	104	FAM104	C1045	1045	140
TRIAL8	MB2	AB1	121	FAM110	C1104	1104	134	288
TRIAL8	MB2	AB1	122	FAM135	C1353	1353	178	293
TRIAL8	MB2	AB1	153	FAM262	C2622	2622	151	268
TRIAL8	MB2	AB1	154	FAM177	C1777	1777	141	275
TRIAL8	MB2	AB1	173	FAM135	C1354	1354	135
TRIAL8	MB2	AB1	174	FAM148	C1483	1483	132	288
TRIAL8	MB2	AB2	45	FAM108	C1088	1088	140	289
TRIAL8	MB2	AB2	46	FAM147	C1471	1471	137
TRIAL8	MB2	AB2	73	FAM180	C1802	1802	115	286
TRIAL8	MB2	AB2	74	FAM201	C2012	2012	141	286
TRIAL8	MB2	AB2	97	FAM102	C1028	1028	139	269
TRIAL8	MB2	AB2	98	FAM202	C2024	2024	140	293
TRIAL8	MB2	AB3	125	FAM289	C2894	2894	137	286
TRIAL8	MB2	AB3	126	FAM242	C2424	2424	140
TRIAL8	MB2	AB3	149	FAM144	C1443	1443	133
TRIAL8	MB2	AB3	150	FAM293	C2932	2932	135
TRIAL8	MB2	AB3	177	FAM180	C1808	1808	138	286
TRIAL8	MB2	AB3	178	FAM289	C2897	2897	137	293
TRIAL8	MB2	AB4	123	FAM286	C2862	2862	134	288
TRIAL8	MB2	AB4	124			3149	137
TRIAL8	MB2	AB4	151	FAM110	C1101	1101	137	281
TRIAL8	MB2	AB4	152	FAM286	C2864	2864	137	293
TRIAL8	MB2	AB4	175	FAM203	C2038	2038	157	278
TRIAL8	MB2	AB4	176	FAM300	C3005	3005	140	293
TRIAL8	MB2	AB5	49	FAM288	C2883	2883	140	270
TRIAL8	MB2	AB5	50	FAM285	C2853	2853	148	272
TRIAL8	MB2	AB5	69	FAM112	C1121	1121	138	286
TRIAL8	MB2	AB5	70	FAM101	C1011	1011	134	288
TRIAL8	MB2	AB5	101	FAM108	C1086	1086	139	293
TRIAL8	MB2	AB5	102	FAM301	C3014	3014	141
TRIAL8	MB2	AB6	47	FAM112	C1127	1127	137	293
TRIAL8	MB2	AB6	48	FAM201	C2013	2013	137	293
TRIAL8	MB2	AB6	71	FAM102	C1021	1021	138	286
TRIAL8	MB2	AB6	72	FAM104	C1045	1045	139
TRIAL8	MB2	AB6	99	FAM100	C1006	1006	135
TRIAL8	MB2	AB6	100	FAM288	C2885	2885	135
TRIAL8	MB2	AB7	43	FAM273	C2732	2732	137
TRIAL8	MB2	AB7	44	FAM107	C1072	1072	138	293
TRIAL8	MB2	AB7	75	FAM202	C2026	2026	132	293
TRIAL8	MB2	AB7	76	FAM300	C3004	3004	141	293
TRIAL8	MB2	AB7	95	FAM262	C2623	2623	137	286
TRIAL8	MB2	AB7	96	FAM104	C1043	1043	140
TRIAL8	MB2	AB8	127	FAM285	C2851	2851	137	277
TRIAL8	MB2	AB8	128	FAM203	C2031	2031	137	293
TRIAL8	MB2	AB8	147	FAM279	C2798	2798	138	275
TRIAL8	MB2	AB8	148	FAM101	C1017	1017	130
TRIAL8	MB2	AB8	179	FAM279	C2792	2792	140	293
TRIAL8	MB2	AB8	180	FAM145	C1451	1451	130	293
TRIAL8	MB3	AB1	129	FAM202	C2024	2024	137	286
TRIAL8	MB3	AB1	130	FAM101	C1011	1011	137	293
TRIAL8	MB3	AB1	145	FAM279	C2792	2792	148
TRIAL8	MB3	AB1	146	FAM262	C2622	2622	135	293
TRIAL8	MB3	AB1	181	FAM203	C2031	2031	137
TRIAL8	MB3	AB1	182	FAM288	C2883	2883	157	293
TRIAL8	MB3	AB2	41	FAM108	C1086	1086	140	275
TRIAL8	MB3	AB2	42	FAM135	C1353	1353	137	270
TRIAL8	MB3	AB2	77	FAM286	C2864	2864	140
TRIAL8	MB3	AB2	78	FAM102	C1021	1021	140	293
TRIAL8	MB3	AB2	93	FAM135	C1354	1354	138
TRIAL8	MB3	AB2	94	FAM112	C1127	1127	154	286
TRIAL8	MB3	AB3	133	FAM300	C3004	3004	137	293
TRIAL8	MB3	AB3	134	FAM273	C2732	2732	135	293
TRIAL8	MB3	AB3	141	FAM180	C1802	1802	135	268
TRIAL8	MB3	AB3	142	FAM201	C2012	2012	140	293
TRIAL8	MB3	AB3	185	FAM289	C2897	2897	135	293
TRIAL8	MB3	AB3	186	FAM101	C1017	1017	130	293
TRIAL8	MB3	AB4	39	FAM202	C2026	2026	137	293
TRIAL8	MB3	AB4	40	FAM110	C1101	1101	137	293
TRIAL8	MB3	AB4	79	FAM201	C2013	2013	179	275
TRIAL8	MB3	AB4	80	FAM289	C2894	2894	137	288
TRIAL8	MB3	AB4	91	FAM293	C2932	2932	140
TRIAL8	MB3	AB4	92	FAM104	C1045	1045	137
TRIAL8	MB3	AB5	131			3149	136
TRIAL8	MB3	AB5	132	FAM107	C1072	1072	134	293
TRIAL8	MB3	AB5	143	FAM300	C3005	3005	140	288
TRIAL8	MB3	AB5	144	FAM100	C1006	1006	134
TRIAL8	MB3	AB5	183	FAM104	C1043	1043	139
TRIAL8	MB3	AB5	184	FAM144	C1443	1443	139	293
TRIAL8	MB3	AB6	135	FAM145	C1451	1451	127	293
TRIAL8	MB3	AB6	136	FAM242	C2424	2424	160
TRIAL8	MB3	AB6	139	FAM279	C2798	2798	141	293
TRIAL8	MB3	AB6	140	FAM262	C2623	2623	135
TRIAL8	MB3	AB6	187	FAM102	C1028	1028	140	268
TRIAL8	MB3	AB6	188	FAM180	C1808	1808	179	293
TRIAL8	MB3	AB7	35	FAM285	C2851	2851	134	269
TRIAL8	MB3	AB7	36	FAM148	C1483	1483	137
TRIAL8	MB3	AB7	83	FAM108	C1088	1088	136	293
TRIAL8	MB3	AB7	84	FAM177	C1777	1777	153	288
TRIAL8	MB3	AB7	87	FAM112	C1121	1121	141	269
TRIAL8	MB3	AB7	88	FAM147	C1471	1471	137	293
TRIAL8	MB3	AB8	37	FAM301	C3014	3014	153	269
TRIAL8	MB3	AB8	38	FAM203	C2038	2038	151	293
TRIAL8	MB3	AB8	81	FAM286	C2862	2862	137	286
TRIAL8	MB3	AB8	82	FAM110	C1104	1104	140	278
TRIAL8	MB3	AB8	89	FAM285	C2853	2853	137	275
TRIAL8	MB3	AB8	90	FAM288	C2885	2885	130
TRIAL8	MB4	AB1	197	FAM144	C1443	1443	134	293
TRIAL8	MB4	AB1	198	FAM148	C1483	1483	133	293
TRIAL8	MB4	AB1	233	FAM262	C2623	2623	132	286
TRIAL8	MB4	AB1	234	FAM300	C3005	3005	140	288
TRIAL8	MB4	AB1	249	FAM102	C1021	1021	135	293
TRIAL8	MB4	AB1	250	FAM301	C3014	3014	155	286
TRIAL8	MB4	AB2	193	FAM201	C2012	2012	137	293
TRIAL8	MB4	AB2	194	FAM285	C2853	2853	134	293
TRIAL8	MB4	AB2	237	FAM177	C1777	1777	130	293
TRIAL8	MB4	AB2	238	FAM110	C1101	1101	137	293
TRIAL8	MB4	AB2	245	FAM203	C2031	2031	137
TRIAL8	MB4	AB2	246	FAM288	C2885	2885	130	293
TRIAL8	MB4	AB3	291	FAM203	C2038	2038	137
TRIAL8	MB4	AB3	292	FAM135	C1354	1354	135	293
TRIAL8	MB4	AB3	295	FAM289	C2897	2897
TRIAL8	MB4	AB3	296	FAM104	C1045	1045	139
TRIAL8	MB4	AB3	343	FAM288	C2883	2883		286
TRIAL8	MB4	AB3	344	FAM202	C2026	2026	132	293
TRIAL8	MB4	AB4	195	FAM108	C1086	1086	138	293
TRIAL8	MB4	AB4	196	FAM262	C2622	2622	137	286
TRIAL8	MB4	AB4	235	FAM180	C1802	1802	114	286
TRIAL8	MB4	AB4	236	FAM180	C1808	1808	123	286
TRIAL8	MB4	AB4	247	FAM104	C1043	1043	138
TRIAL8	MB4	AB4	248	FAM279	C2792	2792	137
TRIAL8	MB4	AB5	289	FAM102	C1028	1028	134	278
TRIAL8	MB4	AB5	290	FAM201	C2013	2013	153	293
TRIAL8	MB4	AB5	297	FAM242	C2424	2424	132
TRIAL8	MB4	AB5	298	FAM285	C2851	2851	130	293
TRIAL8	MB4	AB5	341	FAM107	C1072	1072	135	293
TRIAL8	MB4	AB5	342	FAM286	C2862	2862	137
TRIAL8	MB4	AB6	287	FAM145	C1451	1451	157	286
TRIAL8	MB4	AB6	288	FAM135	C1353	1353	163	293
TRIAL8	MB4	AB6	299	FAM108	C1088	1088	132	293
TRIAL8	MB4	AB6	300	FAM286	C2864	2864	135	293
TRIAL8	MB4	AB6	339	FAM100	C1006	1006	143
TRIAL8	MB4	AB6	340	FAM101	C1011	1011	130	278
TRIAL8	MB4	AB7	285	FAM110	C1104	1104	136	286
TRIAL8	MB4	AB7	286	FAM279	C2798	2798	155	293
TRIAL8	MB4	AB7	301	FAM293	C2932	2932	137
TRIAL8	MB4	AB7	302	FAM273	C2732	2732	136	277
TRIAL8	MB4	AB7	337	FAM147	C1471	1471
TRIAL8	MB4	AB7	338	FAM112	C1121	1121	138	293
TRIAL8	MB4	AB8	191	FAM112	C1127	1127	139	286
TRIAL8	MB4	AB8	192	FAM101	C1017	1017
TRIAL8	MB4	AB8	239			3149	133
TRIAL8	MB4	AB8	240	FAM202	C2024	2024	137	293
TRIAL8	MB4	AB8	243	FAM289	C2894	2894		293
TRIAL8	MB4	AB8	244	FAM300	C3004	3004	137	293
TRIAL8	MB5	AB1	199	FAM101	C1011	1011	135	269
TRIAL8	MB5	AB1	200	FAM101	C1017	1017	137	272
TRIAL8	MB5	AB1	231	FAM286	C2862	2862	137	293
TRIAL8	MB5	AB1	232	FAM100	C1006	1006
TRIAL8	MB5	AB1	251	FAM180	C1808	1808	174	289
TRIAL8	MB5	AB1	252	FAM147	C1471	1471	135
TRIAL8	MB5	AB2	201	FAM203	C2038	2038	138
TRIAL8	MB5	AB2	202	FAM203	C2031	2031	135
TRIAL8	MB5	AB2	229	FAM289	C2897	2897	137
TRIAL8	MB5	AB2	230	FAM112	C1121	1121
TRIAL8	MB5	AB2	253	FAM104	C1043	1043	138
TRIAL8	MB5	AB2	254	FAM135	C1354	1354	134	293
TRIAL8	MB5	AB3	281	FAM202	C2024	2024	138	293
TRIAL8	MB5	AB3	282	FAM289	C2894	2894	137	286
TRIAL8	MB5	AB3	305	FAM300	C3005	3005	141	286
TRIAL8	MB5	AB3	306	FAM288	C2885	2885	135	288
TRIAL8	MB5	AB3	333	FAM135	C1354	1354	137	293
TRIAL8	MB5	AB3	334	FAM145	C1451	1451	135	293
TRIAL8	MB5	AB4	283	FAM293	C2932	2932	153
TRIAL8	MB5	AB4	284	FAM262	C2622	2622	140	293
TRIAL8	MB5	AB4	303	FAM285	C2853	2853	134	293
TRIAL8	MB5	AB4	304	FAM102	C1021	1021	137	286
TRIAL8	MB5	AB4	335	FAM108	C1088	1088
TRIAL8	MB5	AB4	336	FAM262	C2623	2623	137	275
TRIAL8	MB5	AB5	277	FAM285	C2851	2851	134	293
TRIAL8	MB5	AB5	278	FAM104	C1045	1045	141	293
TRIAL8	MB5	AB5	309	FAM286	C2864	2864
TRIAL8	MB5	AB5	310	FAM107	C1072	1072	129	293
TRIAL8	MB5	AB5	329	FAM301	C3014	3014	139
TRIAL8	MB5	AB5	330	FAM201	C2012	2012	137
TRIAL8	MB5	AB6	203	FAM144	C1443	1443	137
TRIAL8	MB5	AB6	204	FAM110	C1104	1104	137	288
TRIAL8	MB5	AB6	227	FAM279	C2798	2798	135	293
TRIAL8	MB5	AB6	228	FAM288	C2883	2883	138	293
TRIAL8	MB5	AB6	255	FAM300	C3004	3004	137
TRIAL8	MB5	AB6	256	FAM201	C2013	2013	153
TRIAL8	MB5	AB7	279	FAM110	C1101	1101	140	286
TRIAL8	MB5	AB7	280	FAM112	C1127	1127	137	286
TRIAL8	MB5	AB7	307	FAM177	C1777	1777	134
TRIAL8	MB5	AB7	308	FAM102	C1028	1028	135	286
TRIAL8	MB5	AB7	331	FAM273	C2732	2732	138	293
TRIAL8	MB5	AB7	332	FAM279	C2792	2792	137
TRIAL8	MB5	AB8	205	FAM148	C1483	1483	129	286
TRIAL8	MB5	AB8	206	FAM180	C1802	1802	134	288
TRIAL8	MB5	AB8	225	FAM202	C2026	2026	138	293
TRIAL8	MB5	AB8	226	FAM242	C2424	2424	137
TRIAL8	MB5	AB8	257	FAM108	C1086	1086	138	288
TRIAL8	MB5	AB8	258			3149
TRIAL8	MB6	AB1	213	FAM101	C1011	1011	137	286
TRIAL8	MB6	AB1	214	FAM203	C2031	2031	130
TRIAL8	MB6	AB1	217	FAM262	C2623	2623	136
TRIAL8	MB6	AB1	218	FAM147	C1471	1471	135
TRIAL8	MB6	AB1	265	FAM112	C1127	1127	137	288
TRIAL8	MB6	AB1	266	FAM202	C2026	2026	133	293
TRIAL8	MB6	AB2	269	FAM110	C1104	1104
TRIAL8	MB6	AB2	270	FAM262	C2622	2622	135	293
TRIAL8	MB6	AB2	317	FAM107	C1072	1072
TRIAL8	MB6	AB2	318	FAM104	C1045	1045
TRIAL8	MB6	AB2	321	FAM145	C1451	1451	135
TRIAL8	MB6	AB2	322			3149	137
TRIAL8	MB6	AB3	211	FAM101	C1017	1017
TRIAL8	MB6	AB3	212	FAM104	C1043	1043
TRIAL8	MB6	AB3	219	FAM102	C1021	1021	135	293
TRIAL8	MB6	AB3	220	FAM285	C2851	2851	135	293
TRIAL8	MB6	AB3	263	FAM135	C1354	1354	140	275
TRIAL8	MB6	AB3	264	FAM285	C2853	2853	137	293
TRIAL8	MB6	AB4	271	FAM108	C1088	1088
TRIAL8	MB6	AB4	272	FAM279	C2792	2792	137
TRIAL8	MB6	AB4	315	FAM177	C1777	1777
TRIAL8	MB6	AB4	316	FAM144	C1443	1443
TRIAL8	MB6	AB4	323	FAM286	C2862	2862	133	293
TRIAL8	MB6	AB4	324	FAM289	C2897	2897
TRIAL8	MB6	AB5	273	FAM242	C2424	2424	153
TRIAL8	MB6	AB5	274	FAM203	C2038	2038	138	293
TRIAL8	MB6	AB5	313	FAM301	C3014	3014	140
TRIAL8	MB6	AB5	314	FAM102	C1028	1028	140	268
TRIAL8	MB6	AB5	325	FAM135	C1353	1353	137	286
TRIAL8	MB6	AB5	326	FAM202	C2024	2024
TRIAL8	MB6	AB6	209	FAM110	C1101	1101
TRIAL8	MB6	AB6	210	FAM286	C2864	2864	135	293
TRIAL8	MB6	AB6	221	FAM300	C3004	3004
TRIAL8	MB6	AB6	222	FAM279	C2798	2798	135
TRIAL8	MB6	AB6	261	FAM180	C1808	1808	130	293
TRIAL8	MB6	AB6	262	FAM148	C1483	1483	137	286
TRIAL8	MB6	AB7	275	FAM300	C3005	3005
TRIAL8	MB6	AB7	276	FAM201	C2013	2013	137
TRIAL8	MB6	AB7	311	FAM108	C1086	1086	140	269
TRIAL8	MB6	AB7	312	FAM201	C2012	2012	135
TRIAL8	MB6	AB7	327	FAM289	C2894	2894
TRIAL8	MB6	AB7	328	FAM112	C1121	1121	137	288
TRIAL8	MB6	AB8	207	FAM273	C2732	2732	135	293
TRIAL8	MB6	AB8	208	FAM100	C1006	1006	137
TRIAL8	MB6	AB8	223	FAM288	C2885	2885	132
TRIAL8	MB6	AB8	224	FAM288	C2883	2883	138	293
TRIAL8	MB6	AB8	259	FAM293	C2932	2932	137
TRIAL8	MB6	AB8	260	FAM180	C1802	1802	135	288
TRIAL8	MB7	AB1	369	FAM135	C1353	1353	137	268
TRIAL8	MB7	AB1	370	FAM262	C2623	2623	137	286
TRIAL8	MB7	AB1	373	FAM201	C2012	2012	138	288
TRIAL8	MB7	AB1	374			3149
TRIAL8	MB7	AB1	421	FAM288	C2885	2885	135
TRIAL8	MB7	AB1	422	FAM279	C2798	2798	138	278
TRIAL8	MB7	AB2	363	FAM135	C1354	1354	138	293
TRIAL8	MB7	AB2	364	FAM279	C2792	2792	137
TRIAL8	MB7	AB2	379	FAM100	C1006	1006	134
TRIAL8	MB7	AB2	380	FAM242	C2424	2424	137
TRIAL8	MB7	AB2	415	FAM112	C1121	1121
TRIAL8	MB7	AB2	416	FAM107	C1072	1072	137
TRIAL8	MB7	AB3	365	FAM273	C2732	2732	132
TRIAL8	MB7	AB3	366	FAM101	C1011	1011
TRIAL8	MB7	AB3	377	FAM148	C1483	1483
TRIAL8	MB7	AB3	378	FAM144	C1443	1443	140	269
TRIAL8	MB7	AB3	417	FAM104	C1045	1045	140
TRIAL8	MB7	AB3	418	FAM262	C2625	2625	160
TRIAL8	MB7	AB4	367	FAM145	C1451	1451
TRIAL8	MB7	AB4	368	FAM180	C1802	1802	137	275
TRIAL8	MB7	AB4	375	FAM201	C2013	2013	134
TRIAL8	MB7	AB4	376	FAM286	C2864	2864	135	286
TRIAL8	MB7	AB4	419	FAM289	C2897	2897	136	269
TRIAL8	MB7	AB4	420	FAM285	C2853	2853	137	278
TRIAL8	MB7	AB5	425	FAM202	C2026	2026	137	286
TRIAL8	MB7	AB5	426	FAM285	C2851	2851
TRIAL8	MB7	AB5	473	FAM300	C3005	3005	140
TRIAL8	MB7	AB5	474	FAM288	C2883	2883	139	272
TRIAL8	MB7	AB5	477	FAM180	C1808	1808	135
TRIAL8	MB7	AB5	478	FAM177	C1777	1777	135
TRIAL8	MB7	AB6	427	FAM101	C1017	1017
TRIAL8	MB7	AB6	428	FAM110	C1104	1104
TRIAL8	MB7	AB6	471	FAM293	C2932	2932	140
TRIAL8	MB7	AB6	472	FAM108	C1088	1088	137
TRIAL8	MB7	AB6	479	FAM203	C2038	2038	137
TRIAL8	MB7	AB6	480	FAM112	C1127	1127	137	293
TRIAL8	MB7	AB7	429	FAM262	C2622	2622
TRIAL8	MB7	AB7	430	FAM301	C3014	3014
TRIAL8	MB7	AB7	469	FAM110	C1101	1101
TRIAL8	MB7	AB7	470	FAM147	C1471	1471	137	268
TRIAL8	MB7	AB7	481	FAM289	C2894	2894
TRIAL8	MB7	AB7	482	FAM104	C1043	1043	160	293
TRIAL8	MB7	AB8	431	FAM203	C2031	2031
TRIAL8	MB7	AB8	432	FAM102	C1021	1021	137	293
TRIAL8	MB7	AB8	467	FAM300	C3004	3004	138
TRIAL8	MB7	AB8	468	FAM108	C1086	1086
TRIAL8	MB7	AB8	483	FAM286	C2862	2862
TRIAL8	MB7	AB8	484	FAM102	C1028	1028	137	275
TRIAL8	MB8	AB1	433	FAM242	C2424	2424	136
TRIAL8	MB8	AB1	434	FAM201	C2012	2012	134
TRIAL8	MB8	AB1	465	FAM144	C1443	1443	137
TRIAL8	MB8	AB1	466	FAM101	C1011	1011	136	286
TRIAL8	MB8	AB1	485	FAM110	C1101	1101	135
TRIAL8	MB8	AB1	486	FAM135	C1354	1354	134
TRIAL8	MB8	AB2	437	FAM288	C2883	2883	140	293
TRIAL8	MB8	AB2	438	FAM289	C2897	2897	137
TRIAL8	MB8	AB2	461	FAM102	C1028	1028	139	293
TRIAL8	MB8	AB2	462	FAM102	C1021	1021	137	293
TRIAL8	MB8	AB2	489	FAM147	C1471	1471	137
TRIAL8	MB8	AB2	490			3149	135
TRIAL8	MB8	AB3	357	FAM279	C2792	2792	137
TRIAL8	MB8	AB3	358	FAM148	C1483	1483	137	278
TRIAL8	MB8	AB3	385	FAM262	C2623	2623	139
TRIAL8	MB8	AB3	386	FAM201	C2013	2013	137	293
TRIAL8	MB8	AB3	409	FAM101	C1017	1017	134
TRIAL8	MB8	AB3	410	FAM203	C2038	2038	137
TRIAL8	MB8	AB4	355	FAM112	C1127	1127	137	293
TRIAL8	MB8	AB4	356	FAM180	C1808	1808	137	293
TRIAL8	MB8	AB4	387	FAM107	C1072	1072
TRIAL8	MB8	AB4	388	FAM285	C2853	2853	135
TRIAL8	MB8	AB4	407	FAM112	C1121	1121	139	293
TRIAL8	MB8	AB4	408	FAM263	C2631	2631
TRIAL8	MB8	AB5	361	FAM288	C2885	2885	157	293
TRIAL8	MB8	AB5	362	FAM108	C1088	1088	138	293
TRIAL8	MB8	AB5	381	FAM279	C2798	2798	135
TRIAL8	MB8	AB5	382	FAM108	C1086	1086
TRIAL8	MB8	AB5	413	FAM104	C1043	1043	138
TRIAL8	MB8	AB5	414	FAM104	C1045	1045	137
TRIAL8	MB8	AB6	435	FAM202	C2026	2026	137	293
TRIAL8	MB8	AB6	436	FAM100	C1006	1006	134
TRIAL8	MB8	AB6	463	FAM145	C1451	1451
TRIAL8	MB8	AB6	464	FAM300	C3004	3004	137
TRIAL8	MB8	AB6	487	FAM177	C1777	1777	130
TRIAL8	MB8	AB6	488	FAM201	C2012	2012	135
TRIAL8	MB8	AB7	439	FAM289	C2894	2894	137	288
TRIAL8	MB8	AB7	440	FAM262	C2622	2622	153	288
TRIAL8	MB8	AB7	459	FAM273	C2732	2732	135	293
TRIAL8	MB8	AB7	460	FAM286	C2862	2862	134
TRIAL8	MB8	AB7	491	FAM135	C1353	1353	132	293
TRIAL8	MB8	AB7	492	FAM285	C2851	2851	133	293
TRIAL8	MB8	AB8	359	FAM203	C2031	2031	134
TRIAL8	MB8	AB8	360	FAM180	C1802	1802	161	293
TRIAL8	MB8	AB8	383	FAM286	C2864	2864	136
TRIAL8	MB8	AB8	384	FAM110	C1104	1104	137	293
TRIAL8	MB8	AB8	411	FAM300	C3005	3005	138	293
TRIAL8	MB8	AB8	412	FAM293	C2932	2932	137
TRIAL8	MB9	AB1	347	FAM293	C2932	2932	137
TRIAL8	MB9	AB1	348			3149	137
TRIAL8	MB9	AB1	395	FAM101	C1011	1011	134	272
TRIAL8	MB9	AB1	396	FAM300	C3004	3004	137
TRIAL8	MB9	AB1	399	FAM288	C2885	2885	130	293
TRIAL8	MB9	AB1	400	FAM285	C2851	2851	133
TRIAL8	MB9	AB2	441	FAM203	C2031	2031	137	293
TRIAL8	MB9	AB2	442	FAM289	C2894	2894	136	293
TRIAL8	MB9	AB2	457	FAM148	C1483	1483	130	293
TRIAL8	MB9	AB2	458	FAM285	C2853	2853	130	293
TRIAL8	MB9	AB2	493	FAM102	C1028	1028	140	286
TRIAL8	MB9	AB2	494	FAM100	C1006	1006	135
TRIAL8	MB9	AB3	349	FAM279	C2792	2792	137	293
TRIAL8	MB9	AB3	350	FAM201	C2012	2012	135	293
TRIAL8	MB9	AB3	393	FAM180	C1808	1808	135	293
TRIAL8	MB9	AB3	394	FAM202	C2026	2026	134	293
TRIAL8	MB9	AB3	401	FAM102	C1021	1021	133	293
TRIAL8	MB9	AB3	402	FAM110	C1104	1104	134	293
TRIAL8	MB9	AB4	447	FAM262	C2623	2623	135	293
TRIAL8	MB9	AB4	448	FAM180	C1802	1802	134	278
TRIAL8	MB9	AB4	451	FAM286	C2862	2862	130
TRIAL8	MB9	AB4	452	FAM135	C1354	1354	135	293
TRIAL8	MB9	AB4	499	FAM104	C1045	1045	137
TRIAL8	MB9	AB4	500	FAM112	C1121	1121	138	293
TRIAL8	MB9	AB5	443	FAM135	C1353	1353	134	293
TRIAL8	MB9	AB5	444	FAM107	C1072	1072	134
TRIAL8	MB9	AB5	455	FAM110	C1101	1101	138
TRIAL8	MB9	AB5	456	FAM288	C2883	2883	137
TRIAL8	MB9	AB5	495	FAM108	C1088	1088	135	293
TRIAL8	MB9	AB5	496	FAM101	C1017	1017	133	293
TRIAL8	MB9	AB6	445	FAM203	C2038	2038	137
TRIAL8	MB9	AB6	446	FAM273	C2732	2732	130
TRIAL8	MB9	AB6	453	FAM145	C1451	1451	123	293
TRIAL8	MB9	AB6	454	FAM108	C1086	1086	155	293
TRIAL8	MB9	AB6	497	FAM144	C1443	1443	137	293
TRIAL8	MB9	AB6	498	FAM147	C1471	1471	136	276
TRIAL8	MB9	AB7	353	FAM279	C2798	2798	136
TRIAL8	MB9	AB7	354	FAM289	C2897	2897	137	268
TRIAL8	MB9	AB7	389	FAM263	C2631	2631	153
TRIAL8	MB9	AB7	390	FAM300	C3005	3005	141	275
TRIAL8	MB9	AB7	405	FAM263	C2631	2631
TRIAL8	MB9	AB7	406	FAM262	C2622	2622	132	293
TRIAL8	MB9	AB8	351	FAM177	C1777	1777	157	278
TRIAL8	MB9	AB8	352	FAM104	C1043	1043	138
TRIAL8	MB9	AB8	391	FAM201	C2013	2013	137	293
TRIAL8	MB9	AB8	392	FAM286	C2864	2864	136	293
TRIAL8	MB9	AB8	403	FAM242	C2424	2424	137
TRIAL8	MB9	AB8	404	FAM263	C2631	2631	137
TRIAL2	MB1	AB1	1587	FAM213	CX-T-T-11-03	FAM213
TRIAL2	MB1	AB1	1588	FAM213	CX-T-T-11-03	FAM213
TRIAL2	MB1	AB1	1589	FAM213	CX-T-T-11-03	FAM213
TRIAL2	MB1	AB1	1590		DM 1	DM 1	133	272
TRIAL2	MB1	AB1	1591		DM 1	DM 1	131	269
TRIAL2	MB1	AB1	1592		DM 1	DM 1	135	293
TRIAL2	MB1	AB1	1593	FAM256	CX-T-T-46-04	FAM256
TRIAL2	MB1	AB1	1594	FAM256	CX-T-T-46-04	FAM256
TRIAL2	MB1	AB1	1595	FAM256	CX-T-T-46-04	FAM256
TRIAL2	MB1	AB1	1688	FAM293	CX-T-T-108-04	FAM293	116	275
TRIAL2	MB1	AB1	1689	FAM293	CX-T-T-108-04	FAM293	128	293
TRIAL2	MB1	AB1	1690	FAM293	CX-T-T-108-04	FAM293	122	278
TRIAL2	MB1	AB1	1691	FAM248	CX-T-T-86-03	FAM248	133	278
TRIAL2	MB1	AB1	1692	FAM248	CX-T-T-86-03	FAM248	135	293
TRIAL2	MB1	AB1	1693	FAM248	CX-T-T-86-03	FAM248	139	286
TRIAL2	MB1	AB1	1694	FAM275	CX-T-T-69-04	FAM275	137	275
TRIAL2	MB1	AB1	1695	FAM275	CX-T-T-69-04	FAM275	139	272
TRIAL2	MB1	AB1	1696	FAM275	CX-T-T-69-04	FAM275	131	269
TRIAL2	MB1	AB1	1699	FAM216	CX-T-T-15-03	FAM216
TRIAL2	MB1	AB1	1700	FAM216	CX-T-T-15-03	FAM216
TRIAL2	MB1	AB1	1701	FAM216	CX-T-T-15-03	FAM216
TRIAL2	MB1	AB1	1702	FAM255	CX-T-T-99-03	FAM255	137
TRIAL2	MB1	AB1	1703	FAM255	CX-T-T-99-03	FAM255	137	293
TRIAL2	MB1	AB1	1704	FAM255	CX-T-T-99-03	FAM255	137	293
TRIAL2	MB1	AB1	1705	FAM222	CX-T-T-22-03	FAM222
TRIAL2	MB1	AB1	1706	FAM222	CX-T-T-22-03	FAM222	134	278
TRIAL2	MB1	AB1	1707	FAM222	CX-T-T-22-03	FAM222	135	286
TRIAL2	MB1	AB10	915	FAM201	CX-T-T-23-02	FAM201	126	293
TRIAL2	MB1	AB10	916	FAM201	CX-T-T-23-02	FAM201	135	306
TRIAL2	MB1	AB10	917	FAM201	CX-T-T-23-02	FAM201	133	286
TRIAL2	MB1	AB10	918	FAM209	CX-T-T-01-03	FAM209
TRIAL2	MB1	AB10	919	FAM209	CX-T-T-01-03	FAM209
TRIAL2	MB1	AB10	920	FAM209	CX-T-T-01-03	FAM209
TRIAL2	MB1	AB10	921	FAM204	CX-T-T-36-02	FAM204	115	278
TRIAL2	MB1	AB10	922	FAM204	CX-T-T-36-02	FAM204	117	286
TRIAL2	MB1	AB10	923	FAM204	CX-T-T-36-02	FAM204	115	293
TRIAL2	MB1	AB10	1007	FAM295	CX-T-T-113-04	FAM295
TRIAL2	MB1	AB10	1008	FAM295	CX-T-T-113-04	FAM295	131	293
TRIAL2	MB1	AB10	1009	FAM295	CX-T-T-113-04	FAM295
TRIAL2	MB1	AB10	1010	FAM298	CX-T-T-116-04	FAM298	116	288
TRIAL2	MB1	AB10	1011	FAM298	CX-T-T-116-04	FAM298
TRIAL2	MB1	AB10	1012	FAM298	CX-T-T-116-04	FAM298	116	288
TRIAL2	MB1	AB10	1013	FAM301	CX-T-T-122-04	FAM301
TRIAL2	MB1	AB10	1014	FAM301	CX-T-T-122-04	FAM301		293
TRIAL2	MB1	AB10	1015	FAM301	CX-T-T-122-04	FAM301	135	286
TRIAL2	MB1	AB10	1036	FAM207	CX-T-T-61-02	FAM207
TRIAL2	MB1	AB10	1037	FAM207	CX-T-T-61-02	FAM207
TRIAL2	MB1	AB10	1038	FAM207	CX-T-T-61-02	FAM207
TRIAL2	MB1	AB10	1039	FAM287	CX-T-T-100-04	FAM287	120	286
TRIAL2	MB1	AB10	1040	FAM287	CX-T-T-100-04	FAM287	122	293
TRIAL2	MB1	AB10	1041	FAM287	CX-T-T-100-04	FAM287	123	293
TRIAL2	MB1	AB10	1042	FAM262	CX-T-T-52-04	FAM262	123	286
TRIAL2	MB1	AB10	1043	FAM262	CX-T-T-52-04	FAM262	130	293
TRIAL2	MB1	AB10	1044	FAM262	CX-T-T-52-04	FAM262	120	286
TRIAL2	MB1	AB2	1596	FAM278	CX-T-T-73-04	FAM278	132	272
TRIAL2	MB1	AB2	1597	FAM278	CX-T-T-73-04	FAM278
TRIAL2	MB1	AB2	1598	FAM278	CX-T-T-73-04	FAM278
TRIAL2	MB1	AB2	1599	FAM244	CX-T-T-77-03	FAM244	114	293
TRIAL2	MB1	AB2	1600	FAM244	CX-T-T-77-03	FAM244	114	281
TRIAL2	MB1	AB2	1601	FAM244	CX-T-T-77-03	FAM244	133
TRIAL2	MB1	AB2	1602	FAM206	CX-T-T-52-02	FAM206
TRIAL2	MB1	AB2	1603	FAM206	CX-T-T-52-02	FAM206
TRIAL2	MB1	AB2	1604	FAM206	CX-T-T-52-02	FAM206
TRIAL2	MB1	AB2	1679	FAM263	CX-T-T-53-04	FAM263	128	293
TRIAL2	MB1	AB2	1680	FAM263	CX-T-T-53-04	FAM263	131	275
TRIAL2	MB1	AB2	1681	FAM263	CX-T-T-53-04	FAM263	122	272
TRIAL2	MB1	AB2	1682	FAM246	CX-T-T-79-03	FAM246	133	293
TRIAL2	MB1	AB2	1683	FAM246	CX-T-T-79-03	FAM246	131	293
TRIAL2	MB1	AB2	1684	FAM246	CX-T-T-79-03	FAM246	128	275
TRIAL2	MB1	AB2	1685	FAM205	CX-T-T-51-02	FAM205		281
TRIAL2	MB1	AB2	1686	FAM205	CX-T-T-51-02	FAM205
TRIAL2	MB1	AB2	1687	FAM205	CX-T-T-51-02	FAM205
TRIAL2	MB1	AB2	1708	FAM253	CX-T-T-97-03	FAM253
TRIAL2	MB1	AB2	1709	FAM253	CX-T-T-97-03	FAM253		275
TRIAL2	MB1	AB2	1710	FAM253	CX-T-T-97-03	FAM253	137
TRIAL2	MB1	AB2	1711	FAM239	CX-T-T-70-03	FAM239	131	269
TRIAL2	MB1	AB2	1712	FAM239	CX-T-T-70-03	FAM239	131	281
TRIAL2	MB1	AB2	1713	FAM239	CX-T-T-70-03	FAM239	131	293
TRIAL2	MB1	AB2	1714	FAM280	CX-T-T-75-04	FAM280	133	278
TRIAL2	MB1	AB2	1715	FAM280	CX-T-T-75-04	FAM280	133	272
TRIAL2	MB1	AB2	1716	FAM280	CX-T-T-75-04	FAM280	131	275
TRIAL2	MB1	AB3	1464	FAM234	CX-T-T-63-03	FAM234	130	275
TRIAL2	MB1	AB3	1465	FAM234	CX-T-T-63-03	FAM234	131	278
TRIAL2	MB1	AB3	1466	FAM234	CX-T-T-63-03	FAM234	135	278
TRIAL2	MB1	AB3	1467	FAM259	CX-T-T-49-04	FAM259
TRIAL2	MB1	AB3	1468	FAM259	CX-T-T-49-04	FAM259
TRIAL2	MB1	AB3	1469	FAM259	CX-T-T-49-04	FAM259
TRIAL2	MB1	AB3	1470	FAM232	CX-T-T-52-03	FAM232	124	286
TRIAL2	MB1	AB3	1471	FAM232	CX-T-T-52-03	FAM232	114	275
TRIAL2	MB1	AB3	1472	FAM232	CX-T-T-52-03	FAM232	131	278
TRIAL2	MB1	AB3	1475	FAM294	CX-T-T-112-04	FAM294	133	275
TRIAL2	MB1	AB3	1476	FAM294	CX-T-T-112-04	FAM294	133	275
TRIAL2	MB1	AB3	1477	FAM294	CX-T-T-112-04	FAM294	130	278
TRIAL2	MB1	AB3	1478	FAM277	CX-T-T-72-04	FAM277	128	278
TRIAL2	MB1	AB3	1479	FAM277	CX-T-T-72-04	FAM277	131	281
TRIAL2	MB1	AB3	1480	FAM277	CX-T-T-72-04	FAM277	133	268
TRIAL2	MB1	AB3	1481	FAM238	CX-T-T-67-03	FAM238	136	293
TRIAL2	MB1	AB3	1482	FAM238	CX-T-T-67-03	FAM238	128	272
TRIAL2	MB1	AB3	1483	FAM238	CX-T-T-67-03	FAM238	116	281
TRIAL2	MB1	AB3	1576	FAM203	CX-T-T-31-02	FAM203	128	293
TRIAL2	MB1	AB3	1577	FAM203	CX-T-T-31-02	FAM203	122	293
TRIAL2	MB1	AB3	1578	FAM203	CX-T-T-31-02	FAM203	133	278
TRIAL2	MB1	AB3	1579		DM 3	DM 3
TRIAL2	MB1	AB3	1580		DM 3	DM 3	128	268
TRIAL2	MB1	AB3	1581		DM 3	DM 3	130	269
TRIAL2	MB1	AB3	1582		WD 1	WD 1	131	268
TRIAL2	MB1	AB3	1583		WD 1	WD 1	135	286
TRIAL2	MB1	AB3	1584		WD 1	WD 1	119	288
TRIAL2	MB1	AB4	1455	FAM272	CX-T-T-66-04	FAM272
TRIAL2	MB1	AB4	1456	FAM272	CX-T-T-66-04	FAM272	119	268
TRIAL2	MB1	AB4	1457	FAM272	CX-T-T-66-04	FAM272	129
TRIAL2	MB1	AB4	1458	FAM252	CX-T-T-96-03	FAM252
TRIAL2	MB1	AB4	1459	FAM252	CX-T-T-96-03	FAM252
TRIAL2	MB1	AB4	1460	FAM252	CX-T-T-96-03	FAM252
TRIAL2	MB1	AB4	1461	FAM231	CX-T-T-51-03	FAM231
TRIAL2	MB1	AB4	1462	FAM231	CX-T-T-51-03	FAM231
TRIAL2	MB1	AB4	1463	FAM231	CX-T-T-51-03	FAM231	135
TRIAL2	MB1	AB4	1484	FAM228	CX-T-T-48-03	FAM228	131	269
TRIAL2	MB1	AB4	1485	FAM228	CX-T-T-48-03	FAM228	120	278
TRIAL2	MB1	AB4	1486	FAM228	CX-T-T-48-03	FAM228	120	268
TRIAL2	MB1	AB4	1487	FAM279	CX-T-T-74-04	FAM279	135	272
TRIAL2	MB1	AB4	1488	FAM279	CX-T-T-74-04	FAM279
TRIAL2	MB1	AB4	1489	FAM279	CX-T-T-74-04	FAM279	120	278
TRIAL2	MB1	AB4	1490	FAM285	CX-T-T-98-04	FAM285	120	293
TRIAL2	MB1	AB4	1491	FAM285	CX-T-T-98-04	FAM285	116	268
TRIAL2	MB1	AB4	1492	FAM285	CX-T-T-98-04	FAM285	120	275
TRIAL2	MB1	AB4	1567	FAM212	CX-T-T-05-03	FAM212
TRIAL2	MB1	AB4	1568	FAM212	CX-T-T-05-03	FAM212
TRIAL2	MB1	AB4	1569	FAM212	CX-T-T-05-03	FAM212	133
TRIAL2	MB1	AB4	1570	FAM243	CX-T-T-76-03	FAM243	131	278
TRIAL2	MB1	AB4	1571	FAM243	CX-T-T-76-03	FAM243
TRIAL2	MB1	AB4	1572	FAM243	CX-T-T-76-03	FAM243
TRIAL2	MB1	AB4	1573	FAM214	CX-T-T-12-03	FAM214
TRIAL2	MB1	AB4	1574	FAM214	CX-T-T-12-03	FAM214	137
TRIAL2	MB1	AB4	1575	FAM214	CX-T-T-12-03	FAM214
TRIAL2	MB1	AB5	1251	FAM302	CX-T-T-123-04	FAM302	123	278
TRIAL2	MB1	AB5	1252	FAM302	CX-T-T-123-04	FAM302	120	269
TRIAL2	MB1	AB5	1253	FAM302	CX-T-T-123-04	FAM302	133	275
TRIAL2	MB1	AB5	1254	FAM276	CX-T-T-70-04	FAM276	131	278
TRIAL2	MB1	AB5	1255	FAM276	CX-T-T-70-04	FAM276	135	286
TRIAL2	MB1	AB5	1256	FAM276	CX-T-T-70-04	FAM276	131	272
TRIAL2	MB1	AB5	1257	FAM286	CX-T-T-99-04	FAM286	119	281
TRIAL2	MB1	AB5	1258	FAM286	CX-T-T-99-04	FAM286	119	281
TRIAL2	MB1	AB5	1259	FAM286	CX-T-T-99-04	FAM286	133	286
TRIAL2	MB1	AB5	1352	FAM240	CX-T-T-72-03	FAM240	128	269
TRIAL2	MB1	AB5	1353	FAM240	CX-T-T-72-03	FAM240	134	281
TRIAL2	MB1	AB5	1354	FAM240	CX-T-T-72-03	FAM240	137	293
TRIAL2	MB1	AB5	1355	FAM268	CX-T-T-62-04	FAM268
TRIAL2	MB1	AB5	1356	FAM268	CX-T-T-62-04	FAM268
TRIAL2	MB1	AB5	1357	FAM268	CX-T-T-62-04	FAM268
TRIAL2	MB1	AB5	1358	FAM249	CX-T-T-93-03	FAM249	132	293
TRIAL2	MB1	AB5	1359	FAM249	CX-T-T-93-03	FAM249	131	293
TRIAL2	MB1	AB5	1360	FAM249	CX-T-T-93-03	FAM249	128	286
TRIAL2	MB1	AB5	1363	FAM250	CX-T-T-94-03	FAM250
TRIAL2	MB1	AB5	1364	FAM250	CX-T-T-94-03	FAM250
TRIAL2	MB1	AB5	1365	FAM250	CX-T-T-94-03	FAM250
TRIAL2	MB1	AB5	1366	FAM288	CX-T-T-101-04	FAM288	120	278
TRIAL2	MB1	AB5	1367	FAM288	CX-T-T-101-04	FAM288	128	275
TRIAL2	MB1	AB5	1368	FAM288	CX-T-T-101-04	FAM288	128	275
TRIAL2	MB1	AB5	1369	FAM296	CX-T-T-114-04	FAM296	133	286
TRIAL2	MB1	AB5	1370	FAM296	CX-T-T-114-04	FAM296	122	269
TRIAL2	MB1	AB5	1371	FAM296	CX-T-T-114-04	FAM296
TRIAL2	MB1	AB6	1260	FAM257	CX-T-T-47-04	FAM257	136	286
TRIAL2	MB1	AB6	1261	FAM257	CX-T-T-47-04	FAM257
TRIAL2	MB1	AB6	1262	FAM257	CX-T-T-47-04	FAM257	137	288
TRIAL2	MB1	AB6	1263	FAM289	CX-T-T-102-04	FAM289	130	293
TRIAL2	MB1	AB6	1264	FAM289	CX-T-T-102-04	FAM289	131	278
TRIAL2	MB1	AB6	1265	FAM289	CX-T-T-102-04	FAM289	128	286
TRIAL2	MB1	AB6	1266	FAM283	CX-T-T-78-04	FAM283	131	272
TRIAL2	MB1	AB6	1267	FAM283	CX-T-T-78-04	FAM283	135	293
TRIAL2	MB1	AB6	1268	FAM283	CX-T-T-78-04	FAM283	135	293
TRIAL2	MB1	AB6	1343	FAM247	CX-T-T-85-03	FAM247	133	293
TRIAL2	MB1	AB6	1344	FAM247	CX-T-T-85-03	FAM247	114	268
TRIAL2	MB1	AB6	1345	FAM247	CX-T-T-85-03	FAM247	120	275
TRIAL2	MB1	AB6	1346	FAM297	CX-T-T-115-04	FAM297	133	269
TRIAL2	MB1	AB6	1347	FAM297	CX-T-T-115-04	FAM297	133	269
TRIAL2	MB1	AB6	1348	FAM297	CX-T-T-115-04	FAM297	133	287
TRIAL2	MB1	AB6	1349	FAM210	CX-T-T-02-03	FAM210
TRIAL2	MB1	AB6	1350	FAM210	CX-T-T-02-03	FAM210
TRIAL2	MB1	AB6	1351	FAM210	CX-T-T-02-03	FAM210	136	286
TRIAL2	MB1	AB6	1372		WD 2	WD 2	122	293
TRIAL2	MB1	AB6	1373		WD 2	WD 2	128	293
TRIAL2	MB1	AB6	1374		WD 2	WD 2	115	293
TRIAL2	MB1	AB6	1375	FAM236	CX-T-T-65-03	FAM236	133	293
TRIAL2	MB1	AB6	1376	FAM236	CX-T-T-65-03	FAM236	133	268
TRIAL2	MB1	AB6	1377	FAM236	CX-T-T-65-03	FAM236	122	286
TRIAL2	MB1	AB6	1378	FAM208	CX-T-T-62-02	FAM208
TRIAL2	MB1	AB6	1379	FAM208	CX-T-T-62-02	FAM208
TRIAL2	MB1	AB6	1380	FAM208	CX-T-T-62-02	FAM208
TRIAL2	MB1	AB7	1128		WD 3	WD 3	135	264
TRIAL2	MB1	AB7	1129		WD 3	WD 3	115	275
TRIAL2	MB1	AB7	1130		WD 3	WD 3	114	275
TRIAL2	MB1	AB7	1131	FAM258	CX-T-T-48-04	FAM258	133	293
TRIAL2	MB1	AB7	1132	FAM258	CX-T-T-48-04	FAM258	135	288
TRIAL2	MB1	AB7	1133	FAM258	CX-T-T-48-04	FAM258	135	288
TRIAL2	MB1	AB7	1134	FAM233	CX-T-T-61-03	FAM233	135	269
TRIAL2	MB1	AB7	1135	FAM233	CX-T-T-61-03	FAM233
TRIAL2	MB1	AB7	1136	FAM233	CX-T-T-61-03	FAM233	133	269
TRIAL2	MB1	AB7	1139	FAM230	CX-T-T-50-03	FAM230
TRIAL2	MB1	AB7	1140	FAM230	CX-T-T-50-03	FAM230
TRIAL2	MB1	AB7	1141	FAM230	CX-T-T-50-03	FAM230
TRIAL2	MB1	AB7	1142	FAM215	CX-T-T-14-03	FAM215	137	286
TRIAL2	MB1	AB7	1143	FAM215	CX-T-T-14-03	FAM215	119	293
TRIAL2	MB1	AB7	1144	FAM215	CX-T-T-14-03	FAM215	137	293
TRIAL2	MB1	AB7	1145	FAM218	CX-T-T-17-03	FAM218
TRIAL2	MB1	AB7	1146	FAM218	CX-T-T-17-03	FAM218
TRIAL2	MB1	AB7	1147	FAM218	CX-T-T-17-03	FAM218
TRIAL2	MB1	AB7	1240	FAM241	CX-T-T-73-03	FAM241	120	293
TRIAL2	MB1	AB7	1241	FAM241	CX-T-T-73-03	FAM241	133	293
TRIAL2	MB1	AB7	1242	FAM241	CX-T-T-73-03	FAM241	119	295
TRIAL2	MB1	AB7	1243	FAM219	CX-T-T-19-03	FAM219	135	293
TRIAL2	MB1	AB7	1244	FAM219	CX-T-T-19-03	FAM219	135	293
TRIAL2	MB1	AB7	1245	FAM219	CX-T-T-19-03	FAM219	133	278
TRIAL2	MB1	AB7	1246	FAM226	CX-T-T-26-03	FAM226
TRIAL2	MB1	AB7	1247	FAM226	CX-T-T-26-03	FAM226
TRIAL2	MB1	AB7	1248	FAM226	CX-T-T-26-03	FAM226	133	268
TRIAL2	MB1	AB8	1119	FAM292	CX-T-T-107-04	FAM292	128	275
TRIAL2	MB1	AB8	1120	FAM292	CX-T-T-107-04	FAM292	120	288
TRIAL2	MB1	AB8	1121	FAM292	CX-T-T-107-04	FAM292	122	286
TRIAL2	MB1	AB8	1122		WD 1	WD 1	122	275
TRIAL2	MB1	AB8	1123		WD 1	WD 1	126	286
TRIAL2	MB1	AB8	1124		WD 1	WD 1	120	286
TRIAL2	MB1	AB8	1125	FAM202	CX-T-T-24-02	FAM202	133	286
TRIAL2	MB1	AB8	1126	FAM202	CX-T-T-24-02	FAM202	128	275
TRIAL2	MB1	AB8	1127	FAM202	CX-T-T-24-02	FAM202	123	269
TRIAL2	MB1	AB8	1148	FAM300	CX-T-T-121-04	FAM300	136	288
TRIAL2	MB1	AB8	1149	FAM300	CX-T-T-121-04	FAM300	135	268
TRIAL2	MB1	AB8	1150	FAM300	CX-T-T-121-04	FAM300	136	288
TRIAL2	MB1	AB8	1151	FAM261	CX-T-T-51-04	FAM261	133	275
TRIAL2	MB1	AB8	1152	FAM261	CX-T-T-51-04	FAM261	133	272
TRIAL2	MB1	AB8	1153	FAM261	CX-T-T-51-04	FAM261	133	275
TRIAL2	MB1	AB8	1154	FAM260	CX-T-T-50-04	FAM260
TRIAL2	MB1	AB8	1155	FAM260	CX-T-T-50-04	FAM260
TRIAL2	MB1	AB8	1156	FAM260	CX-T-T-50-04	FAM260
TRIAL2	MB1	AB8	1231	FAM243	CX-T-T-76-03	FAM243	133	269
TRIAL2	MB1	AB8	1232	FAM243	CX-T-T-76-03	FAM243	131	275
TRIAL2	MB1	AB8	1233	FAM243	CX-T-T-76-03	FAM243	128	293
TRIAL2	MB1	AB8	1234	FAM221	CX-T-T-20-03	FAM221	133	293
TRIAL2	MB1	AB8	1235	FAM221	CX-T-T-20-03	FAM221	131	286
TRIAL2	MB1	AB8	1236	FAM221	CX-T-T-20-03	FAM221	131	278
TRIAL2	MB1	AB8	1237	FAM217	CX-T-T-16-03	FAM217
TRIAL2	MB1	AB8	1238	FAM217	CX-T-T-16-03	FAM217
TRIAL2	MB1	AB8	1239	FAM217	CX-T-T-16-03	FAM217
TRIAL2	MB1	AB9	906	FAM235	CX-T-T-64-03	FAM235
TRIAL2	MB1	AB9	907	FAM235	CX-T-T-64-03	FAM235
TRIAL2	MB1	AB9	908	FAM235	CX-T-T-64-03	FAM235
TRIAL2	MB1	AB9	909	FAM237	CX-T-T-66-03	FAM237	133	286
TRIAL2	MB1	AB9	910	FAM237	CX-T-T-66-03	FAM237	133	293
TRIAL2	MB1	AB9	911	FAM237	CX-T-T-66-03	FAM237	122	298
TRIAL2	MB1	AB9	912	FAM223	CX-T-T-23-03	FAM223
TRIAL2	MB1	AB9	913	FAM223	CX-T-T-23-03	FAM223
TRIAL2	MB1	AB9	914	FAM223	CX-T-T-23-03	FAM223
TRIAL2	MB1	AB9	1016	FAM242	CX-T-T-75-03	FAM242	135	293
TRIAL2	MB1	AB9	1017	FAM242	CX-T-T-75-03	FAM242	133	293
TRIAL2	MB1	AB9	1018	FAM242	CX-T-T-75-03	FAM242	120	293
TRIAL2	MB1	AB9	1019	FAM299	CX-T-T-117-04	FAM299	122	275
TRIAL2	MB1	AB9	1020	FAM299	CX-T-T-117-04	FAM299	128	270
TRIAL2	MB1	AB9	1021	FAM299	CX-T-T-117-04	FAM299	115	278
TRIAL2	MB1	AB9	1022		DM 2	DM 2	122	272
TRIAL2	MB1	AB9	1023		DM 2	DM 2	115	272
TRIAL2	MB1	AB9	1024		DM 2	DM 2	131	270
TRIAL2	MB1	AB9	1027	FAM229	CX-T-T-49-03	FAM229	133	293
TRIAL2	MB1	AB9	1028	FAM229	CX-T-T-49-03	FAM229	135	270
TRIAL2	MB1	AB9	1029	FAM229	CX-T-T-49-03	FAM229	135	278
TRIAL2	MB1	AB9	1030	FAM254	CX-T-T-98-03	FAM254	135	272
TRIAL2	MB1	AB9	1031	FAM254	CX-T-T-98-03	FAM254	137	293
TRIAL2	MB1	AB9	1032	FAM254	CX-T-T-98-03	FAM254
TRIAL2	MB1	AB9	1033	FAM273	CX-T-T-67-04	FAM273	133	272
TRIAL2	MB1	AB9	1034	FAM273	CX-T-T-67-04	FAM273	128	269
TRIAL2	MB1	AB9	1035	FAM273	CX-T-T-67-04	FAM273	135	278
TRIAL2	MB2	AB1	1605	FAM234	CX-T-T-63-03	FAM234	134	293
TRIAL2	MB2	AB1	1606	FAM234	CX-T-T-63-03	FAM234	131	286
TRIAL2	MB2	AB1	1607		WD 3-6	WD 3-6	120	293
TRIAL2	MB2	AB1	1608	FAM203	CX-T-T-31-02	FAM203	133	288
TRIAL2	MB2	AB1	1609	FAM203	CX-T-T-31-02	FAM203	135	286
TRIAL2	MB2	AB1	1610	FAM203	CX-T-T-31-02	FAM203	120	293
TRIAL2	MB2	AB1	1611	FAM219	CX-T-T-19-03	FAM219	135	293
TRIAL2	MB2	AB1	1612	FAM219	CX-T-T-19-03	FAM219	137	269
TRIAL2	MB2	AB1	1613	FAM219	CX-T-T-19-03	FAM219	135	278
TRIAL2	MB2	AB1	1670	FAM285	CX-T-T-98-04	FAM285	114	281
TRIAL2	MB2	AB1	1671	FAM285	CX-T-T-98-04	FAM285	114	294
TRIAL2	MB2	AB1	1672	FAM285	CX-T-T-98-04	FAM285	122	269
TRIAL2	MB2	AB1	1673	FAM212	CX-T-T-05-03	FAM212
TRIAL2	MB2	AB1	1674	FAM212	CX-T-T-05-03	FAM212
TRIAL2	MB2	AB1	1675	FAM212	CX-T-T-05-03	FAM212
TRIAL2	MB2	AB1	1676	FAM253	CX-T-T-97-03	FAM253	137
TRIAL2	MB2	AB1	1677	FAM253	CX-T-T-97-03	FAM253		278
TRIAL2	MB2	AB1	1678	FAM253	CX-T-T-97-03	FAM253
TRIAL2	MB2	AB1	1717	FAM301	CX-T-T-122-04	FAM301	120	269
TRIAL2	MB2	AB1	1718	FAM301	CX-T-T-122-04	FAM301	131	293
TRIAL2	MB2	AB1	1719	FAM301	CX-T-T-122-04	FAM301	134	293
TRIAL2	MB2	AB1	1720	FAM262	CX-T-T-52-04	FAM262	129	293
TRIAL2	MB2	AB1	1721	FAM262	CX-T-T-52-04	FAM262	130	293
TRIAL2	MB2	AB1	1722	FAM262	CX-T-T-52-04	FAM262	133	278
TRIAL2	MB2	AB1	1723	FAM237	CX-T-T-66-03	FAM237	131	278
TRIAL2	MB2	AB1	1724	FAM237	CX-T-T-66-03	FAM237	126	293
TRIAL2	MB2	AB1	1725	FAM237	CX-T-T-66-03	FAM237	120	275
TRIAL2	MB2	AB10	933	FAM276	CX-T-T-70-04	FAM276	132	293
TRIAL2	MB2	AB10	934	FAM276	CX-T-T-70-04	FAM276	133	269
TRIAL2	MB2	AB10	935	FAM276	CX-T-T-70-04	FAM276	131	278
TRIAL2	MB2	AB10	936		DM 3	DM 3
TRIAL2	MB2	AB10	937		DM 3	DM 3	119	268
TRIAL2	MB2	AB10	938		DM 3	DM 3	122	261
TRIAL2	MB2	AB10	939	FAM254	CX-T-T-98-03	FAM254
TRIAL2	MB2	AB10	940	FAM254	CX-T-T-98-03	FAM254	137	272
TRIAL2	MB2	AB10	941	FAM254	CX-T-T-98-03	FAM254	137	272
TRIAL2	MB2	AB10	989	FAM242	CX-T-T-75-03	FAM242	133	293
TRIAL2	MB2	AB10	990	FAM242	CX-T-T-75-03	FAM242	126	275
TRIAL2	MB2	AB10	991	FAM242	CX-T-T-75-03	FAM242	131	268
TRIAL2	MB2	AB10	992	FAM236	CX-T-T-65-03	FAM236	119	272
TRIAL2	MB2	AB10	993	FAM236	CX-T-T-65-03	FAM236	114	278
TRIAL2	MB2	AB10	994	FAM236	CX-T-T-65-03	FAM236	131	275
TRIAL2	MB2	AB10	995	FAM226	CX-T-T-26-03	FAM226
TRIAL2	MB2	AB10	996	FAM226	CX-T-T-26-03	FAM226
TRIAL2	MB2	AB10	997		WD 3-6	WD 3-6	133	269
TRIAL2	MB2	AB10	1054	FAM215	CX-T-T-14-03	FAM215	135	293
TRIAL2	MB2	AB10	1055	FAM215	CX-T-T-14-03	FAM215
TRIAL2	MB2	AB10	1056	FAM215	CX-T-T-14-03	FAM215	132	275
TRIAL2	MB2	AB10	1057	FAM260	CX-T-T-50-04	FAM260	130	278
TRIAL2	MB2	AB10	1058	FAM260	CX-T-T-50-04	FAM260	131	275
TRIAL2	MB2	AB10	1059	FAM260	CX-T-T-50-04	FAM260
TRIAL2	MB2	AB10	1060	FAM210	CX-T-T-02-03	FAM210
TRIAL2	MB2	AB10	1061	FAM210	CX-T-T-02-03	FAM210
TRIAL2	MB2	AB10	1062	FAM210	CX-T-T-02-03	FAM210
TRIAL2	MB2	AB2	1614	FAM302	CX-T-T-123-04	FAM302	131
TRIAL2	MB2	AB2	1615	FAM302	CX-T-T-123-04	FAM302	137	293
TRIAL2	MB2	AB2	1616	FAM302	CX-T-T-123-04	FAM302	133	275
TRIAL2	MB2	AB2	1617	FAM255	CX-T-T-99-03	FAM255
TRIAL2	MB2	AB2	1618	FAM255	CX-T-T-99-03	FAM255
TRIAL2	MB2	AB2	1619	FAM255	CX-T-T-99-03	FAM255	131	275
TRIAL2	MB2	AB2	1620	FAM213	CX-T-T-11-03	FAM213	116	269
TRIAL2	MB2	AB2	1621	FAM213	CX-T-T-11-03	FAM213
TRIAL2	MB2	AB2	1622	FAM213	CX-T-T-11-03	FAM213
TRIAL2	MB2	AB2	1661	FAM233	CX-T-T-61-03	FAM233	135	281
TRIAL2	MB2	AB2	1662	FAM233	CX-T-T-61-03	FAM233	136	268
TRIAL2	MB2	AB2	1663	FAM233	CX-T-T-61-03	FAM233	122	268
TRIAL2	MB2	AB2	1664		WD 3	WD 3	124	275
TRIAL2	MB2	AB2	1665		WD 3	WD 3	122	269
TRIAL2	MB2	AB2	1666		WD 3	WD 3	116	275
TRIAL2	MB2	AB2	1667	FAM295	CX-T-T-113-04	FAM295	136	269
TRIAL2	MB2	AB2	1668	FAM295	CX-T-T-113-04	FAM295	122	275
TRIAL2	MB2	AB2	1669	FAM295	CX-T-T-113-04	FAM295	128
TRIAL2	MB2	AB2	1726	FAM279	CX-T-T-74-04	FAM279	131	272
TRIAL2	MB2	AB2	1727	FAM279	CX-T-T-74-04	FAM279	137	269
TRIAL2	MB2	AB2	1728	FAM279	CX-T-T-74-04	FAM279	131	275
TRIAL2	MB2	AB2	1729	FAM249	CX-T-T-93-03	FAM249	133	275
TRIAL2	MB2	AB2	1730	FAM249	CX-T-T-93-03	FAM249	122	281
TRIAL2	MB2	AB2	1731	FAM249	CX-T-T-93-03	FAM249	131	281
TRIAL2	MB2	AB2	1732	FAM217	CX-T-T-16-03	FAM217
TRIAL2	MB2	AB2	1733	FAM217	CX-T-T-16-03	FAM217
TRIAL2	MB2	AB2	1734	FAM217	CX-T-T-16-03	FAM217
TRIAL2	MB2	AB3	1446	FAM232	CX-T-T-52-03	FAM232	116	275
TRIAL2	MB2	AB3	1447	FAM232	CX-T-T-52-03	FAM232	131	269
TRIAL2	MB2	AB3	1448	FAM232	CX-T-T-52-03	FAM232	135	293
TRIAL2	MB2	AB3	1449	FAM238	CX-T-T-67-03	FAM238	131	286
TRIAL2	MB2	AB3	1450	FAM238	CX-T-T-67-03	FAM238	128	293
TRIAL2	MB2	AB3	1451	FAM238	CX-T-T-67-03	FAM238	133	286
TRIAL2	MB2	AB3	1452	FAM299	CX-T-T-117-04	FAM299	115	272
TRIAL2	MB2	AB3	1453	FAM299	CX-T-T-117-04	FAM299	119	269
TRIAL2	MB2	AB3	1454	FAM299	CX-T-T-117-04	FAM299	131	278
TRIAL2	MB2	AB3	1493	FAM280	CX-T-T-75-04	FAM280	120	269
TRIAL2	MB2	AB3	1494	FAM280	CX-T-T-75-04	FAM280	133	278
TRIAL2	MB2	AB3	1495	FAM280	CX-T-T-75-04	FAM280
TRIAL2	MB2	AB3	1496	FAM221	CX-T-T-20-03	FAM221	133	293
TRIAL2	MB2	AB3	1497	FAM221	CX-T-T-20-03	FAM221	130	286
TRIAL2	MB2	AB3	1498	FAM221	CX-T-T-20-03	FAM221	136	293
TRIAL2	MB2	AB3	1499	FAM278	CX-T-T-73-04	FAM278	135	272
TRIAL2	MB2	AB3	1500	FAM278	CX-T-T-73-04	FAM278	136	275
TRIAL2	MB2	AB3	1501	FAM278	CX-T-T-73-04	FAM278	135	269
TRIAL2	MB2	AB3	1558	FAM243	CX-T-T-76-03	FAM243
TRIAL2	MB2	AB3	1559	FAM243	CX-T-T-76-03	FAM243
TRIAL2	MB2	AB3	1560	FAM243	CX-T-T-76-03	FAM243
TRIAL2	MB2	AB3	1561	FAM223	CX-T-T-23-03	FAM223	114	269
TRIAL2	MB2	AB3	1562	FAM223	CX-T-T-23-03	FAM223
TRIAL2	MB2	AB3	1563	FAM223	CX-T-T-23-03	FAM223
TRIAL2	MB2	AB3	1564	FAM283	CX-T-T-78-04	FAM283
TRIAL2	MB2	AB3	1565	FAM283	CX-T-T-78-04	FAM283	131	293
TRIAL2	MB2	AB3	1566	FAM283	CX-T-T-78-04	FAM283	132	286
TRIAL2	MB2	AB4	1437	FAM261	CX-T-T-51-04	FAM261	131	275
TRIAL2	MB2	AB4	1438	FAM261	CX-T-T-51-04	FAM261	120	269
TRIAL2	MB2	AB4	1439	FAM261	CX-T-T-51-04	FAM261	134	275
TRIAL2	MB2	AB4	1440	FAM289	CX-T-T-102-04	FAM289	131	278
TRIAL2	MB2	AB4	1441	FAM289	CX-T-T-102-04	FAM289	120	275
TRIAL2	MB2	AB4	1442	FAM289	CX-T-T-102-04	FAM289	120	293
TRIAL2	MB2	AB4	1443	FAM240	CX-T-T-72-03	FAM240	137	293
TRIAL2	MB2	AB4	1444	FAM240	CX-T-T-72-03	FAM240	131	269
TRIAL2	MB2	AB4	1445	FAM240	CX-T-T-72-03	FAM240	137	264
TRIAL2	MB2	AB4	1502	FAM297	CX-T-T-115-04	FAM297	122	278
TRIAL2	MB2	AB4	1503	FAM297	CX-T-T-115-04	FAM297	133	293
TRIAL2	MB2	AB4	1504	FAM297	CX-T-T-115-04	FAM297	128	278
TRIAL2	MB2	AB4	1505	FAM286	CX-T-T-99-04	FAM286	116	269
TRIAL2	MB2	AB4	1506	FAM286	CX-T-T-99-04	FAM286	120	270
TRIAL2	MB2	AB4	1507	FAM286	CX-T-T-99-04	FAM286	119	269
TRIAL2	MB2	AB4	1508	FAM248	CX-T-T-86-03	FAM248	120	269
TRIAL2	MB2	AB4	1509	FAM248	CX-T-T-86-03	FAM248	122	264
TRIAL2	MB2	AB4	1510	FAM248	CX-T-T-86-03	FAM248	135	272
TRIAL2	MB2	AB4	1549	FAM202	CX-T-T-24-02	FAM202	131	275
TRIAL2	MB2	AB4	1550	FAM202	CX-T-T-24-02	FAM202	119	275
TRIAL2	MB2	AB4	1551	FAM202	CX-T-T-24-02	FAM202	131	293
TRIAL2	MB2	AB4	1552	FAM218	CX-T-T-17-03	FAM218
TRIAL2	MB2	AB4	1553	FAM218	CX-T-T-17-03	FAM218
TRIAL2	MB2	AB4	1554	FAM218	CX-T-T-17-03	FAM218
TRIAL2	MB2	AB4	1555	FAM246	CX-T-T-79-03	FAM246	133	269
TRIAL2	MB2	AB4	1556	FAM246	CX-T-T-79-03	FAM246	119	269
TRIAL2	MB2	AB4	1557	FAM246	CX-T-T-79-03	FAM246	133	272
TRIAL2	MB2	AB5	1269	FAM277	CX-T-T-72-04	FAM277	131	286
TRIAL2	MB2	AB5	1270	FAM277	CX-T-T-72-04	FAM277	131	272
TRIAL2	MB2	AB5	1271	FAM277	CX-T-T-72-04	FAM277	133	293
TRIAL2	MB2	AB5	1272	FAM287	CX-T-T-100-04	FAM287	114	275
TRIAL2	MB2	AB5	1273	FAM287	CX-T-T-100-04	FAM287	128	272
TRIAL2	MB2	AB5	1274	FAM287	CX-T-T-100-04	FAM287	122	275
TRIAL2	MB2	AB5	1275	FAM256	CX-T-T-46-04	FAM256	130
TRIAL2	MB2	AB5	1276	FAM256	CX-T-T-46-04	FAM256	139	286
TRIAL2	MB2	AB5	1277	FAM256	CX-T-T-46-04	FAM256
TRIAL2	MB2	AB5	1334	FAM245	CX-T-T-78-03	FAM245	133	278
TRIAL2	MB2	AB5	1335	FAM245	CX-T-T-78-03	FAM245	137	275
TRIAL2	MB2	AB5	1336	FAM245	CX-T-T-78-03	FAM245	133	272
TRIAL2	MB2	AB5	1337		WD1	WD1	128	278
TRIAL2	MB2	AB5	1338		WD1	WD1	131	275
TRIAL2	MB2	AB5	1339		WD 1	WD 1	120	278
TRIAL2	MB2	AB5	1340	FAM206	CX-T-T-52-02	FAM206
TRIAL2	MB2	AB5	1341	FAM206	CX-T-T-52-02	FAM206
TRIAL2	MB2	AB5	1342	FAM206	CX-T-T-52-02	FAM206
TRIAL2	MB2	AB5	1381	FAM294	CX-T-T-112-04	FAM294	120	275
TRIAL2	MB2	AB5	1382	FAM294	CX-T-T-112-04	FAM294	124	270
TRIAL2	MB2	AB5	1383	FAM294	CX-T-T-112-04	FAM294	133	281
TRIAL2	MB2	AB5	1384	FAM222	CX-T-T-22-03	FAM222	137	293
TRIAL2	MB2	AB5	1385	FAM222	CX-T-T-22-03	FAM222	137	293
TRIAL2	MB2	AB5	1386	FAM222	CX-T-T-22-03	FAM222	137	299
TRIAL2	MB2	AB5	1387	FAM257	CX-T-T-47-04	FAM257	135	294
TRIAL2	MB2	AB5	1388	FAM257	CX-T-T-47-04	FAM257	135	272
TRIAL2	MB2	AB5	1389	FAM257	CX-T-T-47-04	FAM257	136
TRIAL2	MB2	AB6	1278	FAM263	CX-T-T-53-04	FAM263
TRIAL2	MB2	AB6	1279	FAM263	CX-T-T-53-04	FAM263
TRIAL2	MB2	AB6	1280	FAM263	CX-T-T-53-04	FAM263	135	272
TRIAL2	MB2	AB6	1281	FAM208	CX-T-T-62-02	FAM208
TRIAL2	MB2	AB6	1282	FAM208	CX-T-T-62-02	FAM208
TRIAL2	MB2	AB6	1283		WD 3-6	WD 3-6
TRIAL2	MB2	AB6	1284		DM 1	DM 1	122	269
TRIAL2	MB2	AB6	1285		DM 1	DM 1	137
TRIAL2	MB2	AB6	1286		DM 1	DM 1	123	275
TRIAL2	MB2	AB6	1325	FAM252	CX-T-T-96-03	FAM252	133	272
TRIAL2	MB2	AB6	1326	FAM252	CX-T-T-96-03	FAM252
TRIAL2	MB2	AB6	1327	FAM252	CX-T-T-96-03	FAM252
TRIAL2	MB2	AB6	1328	FAM244	CX-T-T-77-03	FAM244	133	269
TRIAL2	MB2	AB6	1329	FAM244	CX-T-T-77-03	FAM244	137	293
TRIAL2	MB2	AB6	1330	FAM244	CX-T-T-77-03	FAM244
TRIAL2	MB2	AB6	1331	FAM228	CX-T-T-48-03	FAM228	133	293
TRIAL2	MB2	AB6	1332	FAM228	CX-T-T-48-03	FAM228	134	278
TRIAL2	MB2	AB6	1333	FAM228	CX-T-T-48-03	FAM228	120	293
TRIAL2	MB2	AB6	1390	FAM296	CX-T-T-114-04	FAM296	116	269
TRIAL2	MB2	AB6	1391	FAM296	CX-T-T-114-04	FAM296	124	249
TRIAL2	MB2	AB6	1392	FAM296	CX-T-T-114-04	FAM296	131	293
TRIAL2	MB2	AB6	1393	FAM235	CX-T-T-64-03	FAM235
TRIAL2	MB2	AB6	1394	FAM235	CX-T-T-64-03	FAM235
TRIAL2	MB2	AB6	1395	FAM235	CX-T-T-64-03	FAM235
TRIAL2	MB2	AB6	1396		WD 2	WD 2	122	286
TRIAL2	MB2	AB6	1397		WD 2	WD 2	116	293
TRIAL2	MB2	AB6	1398		WD 2	WD 2	114	293
TRIAL2	MB2	AB7	1110	FAM239	CX-T-T-70-03	FAM239
TRIAL2	MB2	AB7	1111	FAM239	CX-T-T-70-03	FAM239	135	286
TRIAL2	MB2	AB7	1112	FAM239	CX-T-T-70-03	FAM239	131	272
TRIAL2	MB2	AB7	1113	FAM216	CX-T-T-15-03	FAM216
TRIAL2	MB2	AB7	1114	FAM216	CX-T-T-15-03	FAM216
TRIAL2	MB2	AB7	1115	FAM216	CX-T-T-15-03	FAM216	134	261
TRIAL2	MB2	AB7	1116	FAM205	CX-T-T-51-02	FAM205
TRIAL2	MB2	AB7	1117	FAM205	CX-T-T-51-02	FAM205
TRIAL2	MB2	AB7	1118	FAM205	CX-T-T-51-02	FAM205
TRIAL2	MB2	AB7	1157	FAM207	CX-T-T-61-02	FAM207	139
TRIAL2	MB2	AB7	1158	FAM207	CX-T-T-61-02	FAM207
TRIAL2	MB2	AB7	1159	FAM207	CX-T-T-61-02	FAM207	135	286
TRIAL2	MB2	AB7	1160	FAM231	CX-T-T-51-03	FAM231
TRIAL2	MB2	AB7	1161	FAM231	CX-T-T-51-03	FAM231
TRIAL2	MB2	AB7	1162	FAM231	CX-T-T-51-03	FAM231
TRIAL2	MB2	AB7	1163	FAM298	CX-T-T-116-04	FAM298	133	278
TRIAL2	MB2	AB7	1164	FAM298	CX-T-T-116-04	FAM298	120	293
TRIAL2	MB2	AB7	1165	FAM298	CX-T-T-116-04	FAM298	119	272
TRIAL2	MB2	AB7	1222	FAM245	CX-T-T-78-03	FAM245	131	278
TRIAL2	MB2	AB7	1223	FAM245	CX-T-T-78-03	FAM245	120	293
TRIAL2	MB2	AB7	1224	FAM245	CX-T-T-78-03	FAM245	123	293
TRIAL2	MB2	AB7	1225		WD 1	WD 1	131	268
TRIAL2	MB2	AB7	1226		WD 1	WD 1	116	270
TRIAL2	MB2	AB7	1227		WD 1	WD 1	128	275
TRIAL2	MB2	AB7	1228	FAM288	CX-T-T-101-04	FAM288	115	275
TRIAL2	MB2	AB7	1229	FAM288	CX-T-T-101-04	FAM288	122	275
TRIAL2	MB2	AB7	1230	FAM288	CX-T-T-101-04	FAM288	119	268
TRIAL2	MB2	AB8	1101	FAM247	CX-T-T-85-03	FAM247	133	293
TRIAL2	MB2	AB8	1102	FAM247	CX-T-T-85-03	FAM247	131	270
TRIAL2	MB2	AB8	1103	FAM247	CX-T-T-85-03	FAM247	113	275
TRIAL2	MB2	AB8	1104	FAM209	CX-T-T-01-03	FAM209
TRIAL2	MB2	AB8	1105	FAM209	CX-T-T-01-03	FAM209
TRIAL2	MB2	AB8	1106	FAM209	CX-T-T-01-03	FAM209
TRIAL2	MB2	AB8	1107	FAM214	CX-T-T-12-03	FAM214
TRIAL2	MB2	AB8	1108	FAM214	CX-T-T-12-03	FAM214
TRIAL2	MB2	AB8	1109	FAM214	CX-T-T-12-03	FAM214
TRIAL2	MB2	AB8	1166	FAM250	CX-T-T-94-03	FAM250
TRIAL2	MB2	AB8	1167	FAM250	CX-T-T-94-03	FAM250
TRIAL2	MB2	AB8	1168	FAM250	CX-T-T-94-03	FAM250
TRIAL2	MB2	AB8	1169	FAM229	CX-T-T-49-03	FAM229	122	293
TRIAL2	MB2	AB8	1170	FAM229	CX-T-T-49-03	FAM229	131	293
TRIAL2	MB2	AB8	1171	FAM229	CX-T-T-49-03	FAM229
TRIAL2	MB2	AB8	1172	FAM272	CX-T-T-66-04	FAM272	133
TRIAL2	MB2	AB8	1173	FAM272	CX-T-T-66-04	FAM272	139	261
TRIAL2	MB2	AB8	1174	FAM272	CX-T-T-66-04	FAM272
TRIAL2	MB2	AB8	1213	FAM252	CX-T-T-96-03	FAM252	134	275
TRIAL2	MB2	AB8	1214	FAM252	CX-T-T-96-03	FAM252	134	269
TRIAL2	MB2	AB8	1215	FAM252	CX-T-T-96-03	FAM252	135	269
TRIAL2	MB2	AB8	1216	FAM244	CX-T-T-77-03	FAM244
TRIAL2	MB2	AB8	1217	FAM244	CX-T-T-77-03	FAM244
TRIAL2	MB2	AB8	1218	FAM244	CX-T-T-77-03	FAM244
TRIAL2	MB2	AB8	1219	FAM228	CX-T-T-48-03	FAM228	128	299
TRIAL2	MB2	AB8	1220	FAM228	CX-T-T-48-03	FAM228	131	293
TRIAL2	MB2	AB8	1221	FAM228	CX-T-T-48-03	FAM228	119	286
TRIAL2	MB2	AB9	924	FAM258	CX-T-T-48-04	FAM258
TRIAL2	MB2	AB9	925	FAM258	CX-T-T-48-04	FAM258	137	290
TRIAL2	MB2	AB9	926	FAM258	CX-T-T-48-04	FAM258	119	286
TRIAL2	MB2	AB9	927	FAM292	CX-T-T-107-04	FAM292	122	278
TRIAL2	MB2	AB9	928	FAM292	CX-T-T-107-04	FAM292	131	286
TRIAL2	MB2	AB9	929	FAM292	CX-T-T-107-04	FAM292	131	278
TRIAL2	MB2	AB9	930	FAM204	CX-T-T-36-02	FAM204	126	293
TRIAL2	MB2	AB9	931	FAM204	CX-T-T-36-02	FAM204	115	286
TRIAL2	MB2	AB9	932	FAM204	CX-T-T-36-02	FAM204	124	278
TRIAL2	MB2	AB9	998	FAM259	CX-T-T-49-04	FAM259
TRIAL2	MB2	AB9	999	FAM259	CX-T-T-49-04	FAM259
TRIAL2	MB2	AB9	1000	FAM259	CX-T-T-49-04	FAM259
TRIAL2	MB2	AB9	1001	FAM201	CX-T-T-23-02	FAM201	135	293
TRIAL2	MB2	AB9	1002	FAM201	CX-T-T-23-02	FAM201	128	286
TRIAL2	MB2	AB9	1003	FAM201	CX-T-T-23-02	FAM201	133	293
TRIAL2	MB2	AB9	1004	FAM230	CX-T-T-50-03	FAM230
TRIAL2	MB2	AB9	1005	FAM230	CX-T-T-50-03	FAM230
TRIAL2	MB2	AB9	1006	FAM230	CX-T-T-50-03	FAM230
TRIAL2	MB2	AB9	1045		DM 2	DM 2
TRIAL2	MB2	AB9	1046		DM 2	DM 2	133	286
TRIAL2	MB2	AB9	1047		DM 2	DM 2	119	269
TRIAL2	MB2	AB9	1048	FAM275	CX-T-T-69-04	FAM275	135	273
TRIAL2	MB2	AB9	1049	FAM275	CX-T-T-69-04	FAM275	131	272
TRIAL2	MB2	AB9	1050	FAM275	CX-T-T-69-04	FAM275	131	275
TRIAL2	MB2	AB9	1051	FAM300	CX-T-T-121-04	FAM300	131	278
TRIAL2	MB2	AB9	1052	FAM300	CX-T-T-121-04	FAM300	135	286
TRIAL2	MB2	AB9	1053	FAM300	CX-T-T-121-04	FAM300	137	293
TRIAL2	MB3	AB1	1623	FAM242	CX-T-T-75-03	FAM242	120	275
TRIAL2	MB3	AB1	1624	FAM242	CX-T-T-75-03	FAM242	128	269
TRIAL2	MB3	AB1	1625	FAM242	CX-T-T-75-03	FAM242	120	281
TRIAL2	MB3	AB1	1626	FAM246	CX-T-T-79-03	FAM246	120	269
TRIAL2	MB3	AB1	1627	FAM246	CX-T-T-79-03	FAM246	128	269
TRIAL2	MB3	AB1	1628	FAM246	CX-T-T-79-03	FAM246	137	275
TRIAL2	MB3	AB1	1629	FAM287	CX-T-T-100-04	FAM287	133	286
TRIAL2	MB3	AB1	1630	FAM287	CX-T-T-100-04	FAM287	128	293
TRIAL2	MB3	AB1	1631	FAM287	CX-T-T-100-04	FAM287	129	269
TRIAL2	MB3	AB1	1652	FAM223	CX-T-T-23-03	FAM223
TRIAL2	MB3	AB1	1653	FAM223	CX-T-T-23-03	FAM223
TRIAL2	MB3	AB1	1654	FAM223	CX-T-T-23-03	FAM223	132
TRIAL2	MB3	AB1	1655	FAM241	CX-T-T-73-03	FAM241	120	281
TRIAL2	MB3	AB1	1656	FAM241	CX-T-T-73-03	FAM241	122	286
TRIAL2	MB3	AB1	1657	FAM241	CX-T-T-73-03	FAM241	122	278
TRIAL2	MB3	AB1	1658	FAM300	CX-T-T-121-04	FAM300	131	278
TRIAL2	MB3	AB1	1659	FAM300	CX-T-T-121-04	FAM300	135	293
TRIAL2	MB3	AB1	1660	FAM300	CX-T-T-121-04	FAM300	128	286
TRIAL2	MB3	AB1	1735		WD 2	WD 2	124	269
TRIAL2	MB3	AB1	1736		WD 2	WD 2	130	278
TRIAL2	MB3	AB1	1737		WD 2	WD 2	135	278
TRIAL2	MB3	AB1	1738	FAM249	CX-T-T-93-03	FAM249	131	275
TRIAL2	MB3	AB1	1739	FAM249	CX-T-T-93-03	FAM249	120	293
TRIAL2	MB3	AB1	1740	FAM249	CX-T-T-93-03	FAM249	123	272
TRIAL2	MB3	AB1	1741	FAM203	CX-T-T-31-02	FAM203	130	293
TRIAL2	MB3	AB1	1742	FAM203	CX-T-T-31-02	FAM203	135	286
TRIAL2	MB3	AB1	1743	FAM203	CX-T-T-31-02	FAM203	116	261
TRIAL2	MB3	AB10	951	FAM286	CX-T-T-99-04	FAM286	120	272
TRIAL2	MB3	AB10	952	FAM286	CX-T-T-99-04	FAM286
TRIAL2	MB3	AB10	953	FAM286	CX-T-T-99-04	FAM286	119	286
TRIAL2	MB3	AB10	954	FAM283	CX-T-T-78-04	FAM283	132	286
TRIAL2	MB3	AB10	955	FAM283	CX-T-T-78-04	FAM283
TRIAL2	MB3	AB10	956	FAM283	CX-T-T-78-04	FAM283	132	275
TRIAL2	MB3	AB10	957	FAM254	CX-T-T-98-03	FAM254	137	275
TRIAL2	MB3	AB10	958	FAM254	CX-T-T-98-03	FAM254	136	272
TRIAL2	MB3	AB10	959	FAM254	CX-T-T-98-03	FAM254	137	293
TRIAL2	MB3	AB10	971	FAM263	CX-T-T-53-04	FAM263	133	293
TRIAL2	MB3	AB10	972	FAM263	CX-T-T-53-04	FAM263	131	293
TRIAL2	MB3	AB10	973	FAM263	CX-T-T-53-04	FAM263	120
TRIAL2	MB3	AB10	974	FAM285	CX-T-T-98-04	FAM285	119	275
TRIAL2	MB3	AB10	975	FAM285	CX-T-T-98-04	FAM285	124	278
TRIAL2	MB3	AB10	976	FAM285	CX-T-T-98-04	FAM285	120	272
TRIAL2	MB3	AB10	977	FAM209	CX-T-T-01-03	FAM209
TRIAL2	MB3	AB10	978	FAM209	CX-T-T-01-03	FAM209
TRIAL2	MB3	AB10	979	FAM209	CX-T-T-01-03	FAM209
TRIAL2	MB3	AB10	1072	FAM217	CX-T-T-16-03	FAM217
TRIAL2	MB3	AB10	1073	FAM217	CX-T-T-16-03	FAM217
TRIAL2	MB3	AB10	1074	FAM217	CX-T-T-16-03	FAM217
TRIAL2	MB3	AB10	1075	FAM205	CX-T-T-51-02	FAM205	137	275
TRIAL2	MB3	AB10	1076	FAM205	CX-T-T-51-02	FAM205
TRIAL2	MB3	AB10	1077	FAM205	CX-T-T-51-02	FAM205	123	293
TRIAL2	MB3	AB10	1078	FAM222	CX-T-T-22-03	FAM222	130	293
TRIAL2	MB3	AB10	1079	FAM222	CX-T-T-22-03	FAM222	137	272
TRIAL2	MB3	AB10	1080	FAM222	CX-T-T-22-03	FAM222	135	286
TRIAL2	MB3	AB2	1632	FAM262	CX-T-T-52-04	FAM262	131	269
TRIAL2	MB3	AB2	1633	FAM262	CX-T-T-52-04	FAM262	131	269
TRIAL2	MB3	AB2	1634	FAM262	CX-T-T-52-04	FAM262
TRIAL2	MB3	AB2	1635	FAM278	CX-T-T-73-04	FAM278	135	275
TRIAL2	MB3	AB2	1636	FAM278	CX-T-T-73-04	FAM278	131	270
TRIAL2	MB3	AB2	1637	FAM278	CX-T-T-73-04	FAM278	119	270
TRIAL2	MB3	AB2	1638	FAM202	CX-T-T-24-02	FAM202	120	275
TRIAL2	MB3	AB2	1639	FAM202	CX-T-T-24-02	FAM202	131	293
TRIAL2	MB3	AB2	1640	FAM202	CX-T-T-24-02	FAM202	119	275
TRIAL2	MB3	AB2	1643	FAM288	CX-T-T-101-04	FAM288	120	275
TRIAL2	MB3	AB2	1644	FAM288	CX-T-T-101-04	FAM288	131	275
TRIAL2	MB3	AB2	1645	FAM288	CX-T-T-101-04	FAM288	135	269
TRIAL2	MB3	AB2	1646		WD 1	WD 1	134
TRIAL2	MB3	AB2	1647		WD 1	WD 1
TRIAL2	MB3	AB2	1648		WD 1	WD 1	120	269
TRIAL2	MB3	AB2	1649	FAM235	CX-T-T-64-03	FAM235
TRIAL2	MB3	AB2	1650	FAM235	CX-T-T-64-03	FAM235
TRIAL2	MB3	AB2	1651	FAM235	CX-T-T-64-03	FAM235
TRIAL2	MB3	AB2	1744	FAM213	CX-T-T-11-03	FAM213
TRIAL2	MB3	AB2	1745	FAM213	CX-T-T-11-03	FAM213
TRIAL2	MB3	AB2	1746	FAM213	CX-T-T-11-03	FAM213
TRIAL2	MB3	AB2	1747	FAM236	CX-T-T-65-03	FAM236	128	286
TRIAL2	MB3	AB2	1748	FAM236	CX-T-T-65-03	FAM236	114	278
TRIAL2	MB3	AB2	1749	FAM236	CX-T-T-65-03	FAM236	120	275
TRIAL2	MB3	AB2	1750	FAM259	CX-T-T-49-04	FAM259
TRIAL2	MB3	AB2	1751	FAM259	CX-T-T-49-04	FAM259	135
TRIAL2	MB3	AB2	1752	FAM259	CX-T-T-49-04	FAM259
TRIAL2	MB3	AB3	1428	FAM233	CX-T-T-61-03	FAM233
TRIAL2	MB3	AB3	1429	FAM233	CX-T-T-61-03	FAM233	133	275
TRIAL2	MB3	AB3	1430	FAM233	CX-T-T-61-03	FAM233	137	272
TRIAL2	MB3	AB3	1431	FAM272	CX-T-T-66-04	FAM272	135	269
TRIAL2	MB3	AB3	1432	FAM272	CX-T-T-66-04	FAM272
TRIAL2	MB3	AB3	1433	FAM272	CX-T-T-66-04	FAM272	114
TRIAL2	MB3	AB3	1434	FAM299	CX-T-T-117-04	FAM299	130	275
TRIAL2	MB3	AB3	1435	FAM299	CX-T-T-117-04	FAM299	130	268
TRIAL2	MB3	AB3	1436	FAM299	CX-T-T-117-04	FAM299	122	272
TRIAL2	MB3	AB3	1511	FAM296	CX-T-T-114-04	FAM296	131	269
TRIAL2	MB3	AB3	1512	FAM296	CX-T-T-114-04	FAM296	130	272
TRIAL2	MB3	AB3	1513	FAM296	CX-T-T-114-04	FAM296	131	270
TRIAL2	MB3	AB3	1514	FAM298	CX-T-T-116-04	FAM298	126	269
TRIAL2	MB3	AB3	1515	FAM298	CX-T-T-116-04	FAM298	131	269
TRIAL2	MB3	AB3	1516	FAM298	CX-T-T-116-04	FAM298
TRIAL2	MB3	AB3	1517	FAM297	CX-T-T-115-04	FAM297	135	269
TRIAL2	MB3	AB3	1518	FAM297	CX-T-T-115-04	FAM297	134	272
TRIAL2	MB3	AB3	1519	FAM297	CX-T-T-115-04	FAM297	132	278
TRIAL2	MB3	AB3	1540	FAM212	CX-T-T-05-03	FAM212
TRIAL2	MB3	AB3	1541	FAM212	CX-T-T-05-03	FAM212
TRIAL2	MB3	AB3	1542	FAM212	CX-T-T-05-03	FAM212	135	259
TRIAL2	MB3	AB3	1543		DM 3	DM 3	131	269
TRIAL2	MB3	AB3	1544		DM 3	DM 3
TRIAL2	MB3	AB3	1545		DM 3	DM 3	131	275
TRIAL2	MB3	AB3	1546	FAM275	CX-T-T-69-04	FAM275	134	275
TRIAL2	MB3	AB3	1547	FAM275	CX-T-T-69-04	FAM275
TRIAL2	MB3	AB3	1548	FAM275	CX-T-T-69-04	FAM275	133	278
TRIAL2	MB3	AB4	1419	FAM214	CX-T-T-12-03	FAM214
TRIAL2	MB3	AB4	1420	FAM214	CX-T-T-12-03	FAM214
TRIAL2	MB3	AB4	1421	FAM214	CX-T-T-12-03	FAM214
TRIAL2	MB3	AB4	1422	FAM218	CX-T-T-17-03	FAM218
TRIAL2	MB3	AB4	1423	FAM218	CX-T-T-17-03	FAM218
TRIAL2	MB3	AB4	1424	FAM218	CX-T-T-17-03	FAM218
TRIAL2	MB3	AB4	1425	FAM210	CX-T-T-02-03	FAM210	130
TRIAL2	MB3	AB4	1426	FAM210	CX-T-T-02-03	FAM210
TRIAL2	MB3	AB4	1427	FAM210	CX-T-T-02-03	FAM210
TRIAL2	MB3	AB4	1520	FAM238	CX-T-T-67-03	FAM238	135	298
TRIAL2	MB3	AB4	1521	FAM238	CX-T-T-67-03	FAM238	133	275
TRIAL2	MB3	AB4	1522	FAM238	CX-T-T-67-03	FAM238	133	272
TRIAL2	MB3	AB4	1523	FAM237	CX-T-T-66-03	FAM237	128	293
TRIAL2	MB3	AB4	1524	FAM237	CX-T-T-66-03	FAM237	122	293
TRIAL2	MB3	AB4	1525	FAM237	CX-T-T-66-03	FAM237	136	269
TRIAL2	MB3	AB4	1526	FAM239	CX-T-T-70-03	FAM239	133	293
TRIAL2	MB3	AB4	1527	FAM239	CX-T-T-70-03	FAM239
TRIAL2	MB3	AB4	1528	FAM239	CX-T-T-70-03	FAM239	135	293
TRIAL2	MB3	AB4	1531	FAM294	CX-T-T-112-04	FAM294	135	275
TRIAL2	MB3	AB4	1532	FAM294	CX-T-T-112-04	FAM294	128	272
TRIAL2	MB3	AB4	1533	FAM294	CX-T-T-112-04	FAM294	120	275
TRIAL2	MB3	AB4	1534	FAM292	CX-T-T-107-04	FAM292	120	269
TRIAL2	MB3	AB4	1535	FAM292	CX-T-T-107-04	FAM292	132	269
TRIAL2	MB3	AB4	1536	FAM292	CX-T-T-107-04	FAM292
TRIAL2	MB3	AB4	1537		DM 1	DM 1	120	269
TRIAL2	MB3	AB4	1538		DM 1	DM 1	131	275
TRIAL2	MB3	AB4	1539		DM 1	DM 1	133	261
TRIAL2	MB3	AB5	1287	FAM247	CX-T-T-85-03	FAM247	116	275
TRIAL2	MB3	AB5	1288	FAM247	CX-T-T-85-03	FAM247	119	272
TRIAL2	MB3	AB5	1289	FAM247	CX-T-T-85-03	FAM247	120	275
TRIAL2	MB3	AB5	1290	FAM252	CX-T-T-96-03	FAM252
TRIAL2	MB3	AB5	1291	FAM252	CX-T-T-96-03	FAM252
TRIAL2	MB3	AB5	1292	FAM252	CX-T-T-96-03	FAM252
TRIAL2	MB3	AB5	1293	FAM255	CX-T-T-99-03	FAM255	137	293
TRIAL2	MB3	AB5	1294	FAM255	CX-T-T-99-03	FAM255	132	286
TRIAL2	MB3	AB5	1295	FAM255	CX-T-T-99-03	FAM255	135	278
TRIAL2	MB3	AB5	1316	FAM293	CX-T-T-108-04	FAM293	120	281
TRIAL2	MB3	AB5	1317	FAM293	CX-T-T-108-04	FAM293	131	278
TRIAL2	MB3	AB5	1318	FAM293	CX-T-T-108-04	FAM293	131	275
TRIAL2	MB3	AB5	1319	FAM232	CX-T-T-52-03	FAM232	122	269
TRIAL2	MB3	AB5	1320	FAM232	CX-T-T-52-03	FAM232	120	286
TRIAL2	MB3	AB5	1321	FAM232	CX-T-T-52-03	FAM232	116	275
TRIAL2	MB3	AB5	1322	FAM240	CX-T-T-72-03	FAM240	134	286
TRIAL2	MB3	AB5	1323	FAM240	CX-T-T-72-03	FAM240	136	275
TRIAL2	MB3	AB5	1399	FAM206	CX-T-T-52-02	FAM206
TRIAL2	MB3	AB5	1400	FAM206	CX-T-T-52-02	FAM206
TRIAL2	MB3	AB5	1401	FAM206	CX-T-T-52-02	FAM206
TRIAL2	MB3	AB5	1402	FAM219	CX-T-T-19-03	FAM219	133	269
TRIAL2	MB3	AB5	1403	FAM219	CX-T-T-19-03	FAM219	136	293
TRIAL2	MB3	AB5	1404	FAM219	CX-T-T-19-03	FAM219
TRIAL2	MB3	AB5	1405	FAM201	CX-T-T-23-02	FAM201	134
TRIAL2	MB3	AB5	1406	FAM201	CX-T-T-23-02	FAM201	124	275
TRIAL2	MB3	AB5	1407	FAM201	CX-T-T-23-02	FAM201	135	293
TRIAL2	MB3	AB6	1296	FAM277	CX-T-T-72-04	FAM277	133	287
TRIAL2	MB3	AB6	1297	FAM277	CX-T-T-72-04	FAM277	133	270
TRIAL2	MB3	AB6	1298	FAM277	CX-T-T-72-04	FAM277
TRIAL2	MB3	AB6	1299	FAM221	CX-T-T-20-03	FAM221
TRIAL2	MB3	AB6	1300	FAM221	CX-T-T-20-03	FAM221	135	293
TRIAL2	MB3	AB6	1301	FAM221	CX-T-T-20-03	FAM221	131	293
TRIAL2	MB3	AB6	1302	FAM229	CX-T-T-49-03	FAM229	133	293
TRIAL2	MB3	AB6	1303	FAM229	CX-T-T-49-03	FAM229	123	286
TRIAL2	MB3	AB6	1304	FAM229	CX-T-T-49-03	FAM229	122	286
TRIAL2	MB3	AB6	1307	FAM301	CX-T-T-122-04	FAM301
TRIAL2	MB3	AB6	1308	FAM301	CX-T-T-122-04	FAM301	133	293
TRIAL2	MB3	AB6	1309	FAM301	CX-T-T-122-04	FAM301	135	304
TRIAL2	MB3	AB6	1310	FAM231	CX-T-T-51-03	FAM231	133	272
TRIAL2	MB3	AB6	1311	FAM231	CX-T-T-51-03	FAM231
TRIAL2	MB3	AB6	1312	FAM231	CX-T-T-51-03	FAM231
TRIAL2	MB3	AB6	1313	FAM244	CX-T-T-77-03	FAM244	128	281
TRIAL2	MB3	AB6	1314	FAM244	CX-T-T-77-03	FAM244	122	286
TRIAL2	MB3	AB6	1315	FAM244	CX-T-T-77-03	FAM244	120	269
TRIAL2	MB3	AB6	1408		WD 3	WD 3	114	275
TRIAL2	MB3	AB6	1409		WD 3	WD 3	134	293
TRIAL2	MB3	AB6	1410		WD 3	WD 3	128	278
TRIAL2	MB3	AB6	1411	FAM204	CX-T-T-36-02	FAM204	119	275
TRIAL2	MB3	AB6	1412	FAM204	CX-T-T-36-02	FAM204	132	269
TRIAL2	MB3	AB6	1413	FAM204	CX-T-T-36-02	FAM204	131	269
TRIAL2	MB3	AB6	1414	FAM276	CX-T-T-70-04	FAM276	131	273
TRIAL2	MB3	AB6	1415	FAM276	CX-T-T-70-04	FAM276	135	275
TRIAL2	MB3	AB6	1416	FAM276	CX-T-T-70-04	FAM276	116
TRIAL2	MB3	AB7	1092		WD 1	WD 1	135	293
TRIAL2	MB3	AB7	1093		WD 1	WD 1	133	269
TRIAL2	MB3	AB7	1094		WD 1	WD 1	128	275
TRIAL2	MB3	AB7	1095	FAM256	CX-T-T-46-04	FAM256
TRIAL2	MB3	AB7	1096	FAM256	CX-T-T-46-04	FAM256
TRIAL2	MB3	AB7	1097	FAM256	CX-T-T-46-04	FAM256		272
TRIAL2	MB3	AB7	1098	FAM208	CX-T-T-62-02	FAM208
TRIAL2	MB3	AB7	1099	FAM208	CX-T-T-62-02	FAM208
TRIAL2	MB3	AB7	1100	FAM208	CX-T-T-62-02	FAM208
TRIAL2	MB3	AB7	1175	FAM260	CX-T-T-50-04	FAM260
TRIAL2	MB3	AB7	1176	FAM260	CX-T-T-50-04	FAM260
TRIAL2	MB3	AB7	1177	FAM260	CX-T-T-50-04	FAM260	131
TRIAL2	MB3	AB7	1178	FAM289	CX-T-T-102-04	FAM289	133	269
TRIAL2	MB3	AB7	1179	FAM289	CX-T-T-102-04	FAM289	122	293
TRIAL2	MB3	AB7	1180	FAM289	CX-T-T-102-04	FAM289	120	286
TRIAL2	MB3	AB7	1181	FAM268	CX-T-T-62-04	FAM268
TRIAL2	MB3	AB7	1182	FAM268	CX-T-T-62-04	FAM268
TRIAL2	MB3	AB7	1204	FAM258	CX-T-T-48-04	FAM258	128	286
TRIAL2	MB3	AB7	1205	FAM258	CX-T-T-48-04	FAM258	133	293
TRIAL2	MB3	AB7	1206	FAM258	CX-T-T-48-04	FAM258	132	272
TRIAL2	MB3	AB7	1207	FAM279	CX-T-T-74-04	FAM279		268
TRIAL2	MB3	AB7	1208	FAM279	CX-T-T-74-04	FAM279	130	275
TRIAL2	MB3	AB7	1209	FAM279	CX-T-T-74-04	FAM279	133	270
TRIAL2	MB3	AB7	1210	FAM280	CX-T-T-75-04	FAM280	133	288
TRIAL2	MB3	AB7	1211	FAM280	CX-T-T-75-04	FAM280	122	272
TRIAL2	MB3	AB7	1212	FAM280	CX-T-T-75-04	FAM280	133	275
TRIAL2	MB3	AB8	1083	FAM273	CX-T-T-67-04	FAM273	135	272
TRIAL2	MB3	AB8	1084	FAM273	CX-T-T-67-04	FAM273	135	286
TRIAL2	MB3	AB8	1085	FAM273	CX-T-T-67-04	FAM273	137	288
TRIAL2	MB3	AB8	1086	FAM216	CX-T-T-15-03	FAM216
TRIAL2	MB3	AB8	1087	FAM216	CX-T-T-15-03	FAM216
TRIAL2	MB3	AB8	1088	FAM216	CX-T-T-15-03	FAM216
TRIAL2	MB3	AB8	1089	FAM226	CX-T-T-26-03	FAM226
TRIAL2	MB3	AB8	1090	FAM226	CX-T-T-26-03	FAM226
TRIAL2	MB3	AB8	1091	FAM226	CX-T-T-26-03	FAM226	133	272
TRIAL2	MB3	AB8	1184	FAM243	CX-T-T-76-03	FAM243
TRIAL2	MB3	AB8	1185	FAM243	CX-T-T-76-03	FAM243
TRIAL2	MB3	AB8	1186	FAM243	CX-T-T-76-03	FAM243
TRIAL2	MB3	AB8	1187	FAM257	CX-T-T-47-04	FAM257
TRIAL2	MB3	AB8	1188	FAM257	CX-T-T-47-04	FAM257	134	278
TRIAL2	MB3	AB8	1189	FAM257	CX-T-T-47-04	FAM257	131	272
TRIAL2	MB3	AB8	1190	FAM230	CX-T-T-50-03	FAM230
TRIAL2	MB3	AB8	1191	FAM230	CX-T-T-50-03	FAM230	135
TRIAL2	MB3	AB8	1192	FAM230	CX-T-T-50-03	FAM230	133	275
TRIAL2	MB3	AB8	1195	FAM261	CX-T-T-51-04	FAM261	130	286
TRIAL2	MB3	AB8	1196	FAM261	CX-T-T-51-04	FAM261	133	278
TRIAL2	MB3	AB8	1197	FAM261	CX-T-T-51-04	FAM261	131	275
TRIAL2	MB3	AB8	1198	FAM234	CX-T-T-63-03	FAM234	135	278
TRIAL2	MB3	AB8	1199	FAM234	CX-T-T-63-03	FAM234	128	286
TRIAL2	MB3	AB8	1200	FAM234	CX-T-T-63-03	FAM234
TRIAL2	MB3	AB8	1201	FAM295	CX-T-T-113-04	FAM295	133	278
TRIAL2	MB3	AB8	1202	FAM295	CX-T-T-113-04	FAM295	131	293
TRIAL2	MB3	AB8	1203	FAM295	CX-T-T-113-04	FAM295	131	278
TRIAL2	MB3	AB9	942	FAM302	CX-T-T-123-04	FAM302	137	288
TRIAL2	MB3	AB9	943	FAM302	CX-T-T-123-04	FAM302	131	275
TRIAL2	MB3	AB9	944	FAM302	CX-T-T-123-04	FAM302	128	278
TRIAL2	MB3	AB9	945	FAM248	CX-T-T-86-03	FAM248	119	272
TRIAL2	MB3	AB9	946	FAM248	CX-T-T-86-03	FAM248	120	272
TRIAL2	MB3	AB9	947	FAM248	CX-T-T-86-03	FAM248	123	272
TRIAL2	MB3	AB9	948	FAM207	CX-T-T-61-02	FAM207
TRIAL2	MB3	AB9	949	FAM207	CX-T-T-61-02	FAM207
TRIAL2	MB3	AB9	950	FAM207	CX-T-T-61-02	FAM207
TRIAL2	MB3	AB9	980	FAM250	CX-T-T-94-03	FAM250
TRIAL2	MB3	AB9	981	FAM250	CX-T-T-94-03	FAM250
TRIAL2	MB3	AB9	982	FAM250	CX-T-T-94-03	FAM250
TRIAL2	MB3	AB9	983	FAM253	CX-T-T-97-03	FAM253
TRIAL2	MB3	AB9	984	FAM253	CX-T-T-97-03	FAM253	132	286
TRIAL2	MB3	AB9	985	FAM253	CX-T-T-97-03	FAM253	120	272
TRIAL2	MB3	AB9	986	FAM215	CX-T-T-14-03	FAM215
TRIAL2	MB3	AB9	987	FAM215	CX-T-T-14-03	FAM215	135	272
TRIAL2	MB3	AB9	988	FAM215	CX-T-T-14-03	FAM215	132	278
TRIAL2	MB3	AB9	1063	FAM245	CX-T-T-78-03	FAM245	137	293
TRIAL2	MB3	AB9	1064	FAM245	CX-T-T-78-03	FAM245	134	293
TRIAL2	MB3	AB9	1065	FAM245	CX-T-T-78-03	FAM245	131	278
TRIAL2	MB3	AB9	1066		DM 2	DM 2	135
TRIAL2	MB3	AB9	1067		DM 2	DM 2	120	269
TRIAL2	MB3	AB9	1068		DM 2	DM 2	128	269
TRIAL2	MB3	AB9	1069	FAM228	CX-T-T-48-03	FAM228	120	272
TRIAL2	MB3	AB9	1070	FAM228	CX-T-T-48-03	FAM228	131	269
TRIAL2	MB3	AB9	1071	FAM228	CX-T-T-48-03	FAM228	128	272
TRIAL2	MB4	AB1	774	FAM204	CX-T-T-36-02	FAM204	114	286
TRIAL2	MB4	AB1	775	FAM204	CX-T-T-36-02	FAM204	135	278
TRIAL2	MB4	AB1	776	FAM204	CX-T-T-36-02	FAM204
TRIAL2	MB4	AB1	777	FAM272	CX-T-T-66-04	FAM272
TRIAL2	MB4	AB1	778	FAM272	CX-T-T-66-04	FAM272
TRIAL2	MB4	AB1	779	FAM272	CX-T-T-66-04	FAM272
TRIAL2	MB4	AB1	780	FAM219	CX-T-T-19-03	FAM219	136	293
TRIAL2	MB4	AB1	781	FAM219	CX-T-T-19-03	FAM219	128
TRIAL2	MB4	AB1	782	FAM219	CX-T-T-19-03	FAM219	133	288
TRIAL2	MB4	AB1	785	FAM235	CX-T-T-64-03	FAM235
TRIAL2	MB4	AB1	786	FAM235	CX-T-T-64-03	FAM235
TRIAL2	MB4	AB1	787	FAM235	CX-T-T-64-03	FAM235
TRIAL2	MB4	AB1	788	FAM239	CX-T-T-70-03	FAM239	135
TRIAL2	MB4	AB1	789	FAM239	CX-T-T-70-03	FAM239	128	286
TRIAL2	MB4	AB1	790	FAM239	CX-T-T-70-03	FAM239	134	278
TRIAL2	MB4	AB1	791	FAM260	CX-T-T-50-04	FAM260
TRIAL2	MB4	AB1	792	FAM260	CX-T-T-50-04	FAM260
TRIAL2	MB4	AB1	793	FAM260	CX-T-T-50-04	FAM260
TRIAL2	MB4	AB1	886	FAM222	CX-T-T-22-03	FAM222	133	288
TRIAL2	MB4	AB1	887	FAM222	CX-T-T-22-03	FAM222	136	286
TRIAL2	MB4	AB1	888	FAM222	CX-T-T-22-03	FAM222	135	288
TRIAL2	MB4	AB1	889	FAM249	CX-T-T-93-03	FAM249	134	286
TRIAL2	MB4	AB1	890	FAM249	CX-T-T-93-03	FAM249	137	278
TRIAL2	MB4	AB1	891	FAM249	CX-T-T-93-03	FAM249	123	293
TRIAL2	MB4	AB1	892	FAM234	CX-T-T-63-03	FAM234	132	286
TRIAL2	MB4	AB1	893	FAM234	CX-T-T-63-03	FAM234
TRIAL2	MB4	AB1	894	FAM234	CX-T-T-63-03	FAM234	133	286
TRIAL2	MB4	AB10	93	FAM206	CX-T-T-52-02	FAM206
TRIAL2	MB4	AB10	94	FAM206	CX-T-T-52-02	FAM206
TRIAL2	MB4	AB10	95	FAM206	CX-T-T-52-02	FAM206
TRIAL2	MB4	AB10	96	FAM228	CX-T-T-48-03	FAM228	119	293
TRIAL2	MB4	AB10	97	FAM228	CX-T-T-48-03	FAM228	136	278
TRIAL2	MB4	AB10	98	FAM228	CX-T-T-48-03	FAM228	133
TRIAL2	MB4	AB10	99	FAM268	CX-T-T-62-04	FAM268
TRIAL2	MB4	AB10	100	FAM268	CX-T-T-62-04	FAM268
TRIAL2	MB4	AB10	101	FAM268	CX-T-T-62-04	FAM268	133	293
TRIAL2	MB4	AB10	122	FAM223	CX-T-T-23-03	FAM223
TRIAL2	MB4	AB10	123	FAM223	CX-T-T-23-03	FAM223
TRIAL2	MB4	AB10	124	FAM223	CX-T-T-23-03	FAM223
TRIAL2	MB4	AB10	125	FAM262	CX-T-T-52-04	FAM262	131	275
TRIAL2	MB4	AB10	126	FAM262	CX-T-T-52-04	FAM262	133	286
TRIAL2	MB4	AB10	127	FAM262	CX-T-T-52-04	FAM262	133	293
TRIAL2	MB4	AB10	128	FAM230	CX-T-T-50-03	FAM230	131	262
TRIAL2	MB4	AB10	129	FAM230	CX-T-T-50-03	FAM230
TRIAL2	MB4	AB10	130	FAM230	CX-T-T-50-03	FAM230	128	275
TRIAL2	MB4	AB10	205	FAM210	CX-T-T-02-03	FAM210
TRIAL2	MB4	AB10	206	FAM210	CX-T-T-02-03	FAM210
TRIAL2	MB4	AB10	207	FAM210	CX-T-T-02-03	FAM210
TRIAL2	MB4	AB10	208		DM 3	DM 3	131	269
TRIAL2	MB4	AB10	209		DM 3	DM 3
TRIAL2	MB4	AB10	210		DM 3	DM 3	131	268
TRIAL2	MB4	AB10	211		WD 3-5	WD 3-5	124	293
TRIAL2	MB4	AB10	212	FAM217	CX-T-T-16-03	FAM217
TRIAL2	MB4	AB10	213	FAM217	CX-T-T-16-03	FAM217
TRIAL2	MB4	AB2	765	FAM292	CX-T-T-107-04	FAM292	137	278
TRIAL2	MB4	AB2	766	FAM292	CX-T-T-107-04	FAM292	134	272
TRIAL2	MB4	AB2	767	FAM292	CX-T-T-107-04	FAM292	121	272
TRIAL2	MB4	AB2	768	FAM243	CX-T-T-76-03	FAM243	137	272
TRIAL2	MB4	AB2	769	FAM243	CX-T-T-76-03	FAM243	121
TRIAL2	MB4	AB2	770	FAM243	CX-T-T-76-03	FAM243
TRIAL2	MB4	AB2	771	FAM263	CX-T-T-53-04	FAM263	133	286
TRIAL2	MB4	AB2	772	FAM263	CX-T-T-53-04	FAM263	133	286
TRIAL2	MB4	AB2	773	FAM263	CX-T-T-53-04	FAM263	133	272
TRIAL2	MB4	AB2	794	FAM207	CX-T-T-61-02	FAM207
TRIAL2	MB4	AB2	795	FAM207	CX-T-T-61-02	FAM207
TRIAL2	MB4	AB2	796	FAM207	CX-T-T-61-02	FAM207
TRIAL2	MB4	AB2	797	FAM277	CX-T-T-72-04	FAM277	121	278
TRIAL2	MB4	AB2	798	FAM277	CX-T-T-72-04	FAM277	121	278
TRIAL2	MB4	AB2	799	FAM277	CX-T-T-72-04	FAM277	116	278
TRIAL2	MB4	AB2	800	FAM241	CX-T-T-73-03	FAM241	114	275
TRIAL2	MB4	AB2	801	FAM241	CX-T-T-73-03	FAM241	116	286
TRIAL2	MB4	AB2	802	FAM241	CX-T-T-73-03	FAM241	128	275
TRIAL2	MB4	AB2	877	FAM288	CX-T-T-101-04	FAM288
TRIAL2	MB4	AB2	878	FAM288	CX-T-T-101-04	FAM288	116	286
TRIAL2	MB4	AB2	879	FAM288	CX-T-T-101-04	FAM288	116	286
TRIAL2	MB4	AB2	880	FAM255	CX-T-T-99-03	FAM255	136	278
TRIAL2	MB4	AB2	881	FAM255	CX-T-T-99-03	FAM255	137	293
TRIAL2	MB4	AB2	882	FAM255	CX-T-T-99-03	FAM255	137	288
TRIAL2	MB4	AB2	883	FAM297	CX-T-T-115-04	FAM297
TRIAL2	MB4	AB2	884	FAM297	CX-T-T-115-04	FAM297	121	288
TRIAL2	MB4	AB2	885	FAM297	CX-T-T-115-04	FAM297	130	284
TRIAL2	MB4	AB3	561	FAM236	CX-T-T-65-03	FAM236	133	278
TRIAL2	MB4	AB3	562	FAM236	CX-T-T-65-03	FAM236	119	293
TRIAL2	MB4	AB3	563	FAM236	CX-T-T-65-03	FAM236	119	293
TRIAL2	MB4	AB3	564	FAM244	CX-T-T-77-03	FAM244	128	286
TRIAL2	MB4	AB3	565	FAM244	CX-T-T-77-03	FAM244	117	293
TRIAL2	MB4	AB3	566	FAM244	CX-T-T-77-03	FAM244	114	275
TRIAL2	MB4	AB3	567	FAM261	CX-T-T-51-04	FAM261	133	269
TRIAL2	MB4	AB3	568	FAM261	CX-T-T-51-04	FAM261	131	272
TRIAL2	MB4	AB3	569	FAM261	CX-T-T-51-04	FAM261	131	272
TRIAL2	MB4	AB3	662	FAM233	CX-T-T-61-03	FAM233
TRIAL2	MB4	AB3	663	FAM233	CX-T-T-61-03	FAM233	135	275
TRIAL2	MB4	AB3	664	FAM233	CX-T-T-61-03	FAM233	135	286
TRIAL2	MB4	AB3	665	FAM237	CX-T-T-66-03	FAM237	135	293
TRIAL2	MB4	AB3	666	FAM237	CX-T-T-66-03	FAM237	132	288
TRIAL2	MB4	AB3	667	FAM237	CX-T-T-66-03	FAM237	133	299
TRIAL2	MB4	AB3	668	FAM250	CX-T-T-94-03	FAM250
TRIAL2	MB4	AB3	669	FAM250	CX-T-T-94-03	FAM250
TRIAL2	MB4	AB3	670	FAM250	CX-T-T-94-03	FAM250
TRIAL2	MB4	AB3	673	FAM287	CX-T-T-100-04	FAM287	128	299
TRIAL2	MB4	AB3	674	FAM287	CX-T-T-100-04	FAM287	121	291
TRIAL2	MB4	AB3	675	FAM287	CX-T-T-100-04	FAM287	128	293
TRIAL2	MB4	AB3	676	FAM293	CX-T-T-108-04	FAM293	128	286
TRIAL2	MB4	AB3	677	FAM293	CX-T-T-108-04	FAM293	119	293
TRIAL2	MB4	AB3	678	FAM293	CX-T-T-108-04	FAM293	128	281
TRIAL2	MB4	AB3	679	FAM279	CX-T-T-74-04	FAM279	133	278
TRIAL2	MB4	AB3	680	FAM279	CX-T-T-74-04	FAM279	133	286
TRIAL2	MB4	AB3	681	FAM279	CX-T-T-74-04	FAM279	119	286
TRIAL2	MB4	AB4	570	FAM285	CX-T-T-98-04	FAM285	114	293
TRIAL2	MB4	AB4	571	FAM285	CX-T-T-98-04	FAM285	117	275
TRIAL2	MB4	AB4	572	FAM285	CX-T-T-98-04	FAM285	121	272
TRIAL2	MB4	AB4	573	FAM258	CX-T-T-48-04	FAM258	136	288
TRIAL2	MB4	AB4	574	FAM258	CX-T-T-48-04	FAM258	132
TRIAL2	MB4	AB4	575	FAM258	CX-T-T-48-04	FAM258	129	286
TRIAL2	MB4	AB4	576	FAM298	CX-T-T-116-04	FAM298	116	269
TRIAL2	MB4	AB4	577	FAM298	CX-T-T-116-04	FAM298	116	269
TRIAL2	MB4	AB4	578	FAM298	CX-T-T-116-04	FAM298	133
TRIAL2	MB4	AB4	653	FAM221	CX-T-T-20-03	FAM221	136	268
TRIAL2	MB4	AB4	654	FAM221	CX-T-T-20-03	FAM221	134	286
TRIAL2	MB4	AB4	655	FAM221	CX-T-T-20-03	FAM221	131	275
TRIAL2	MB4	AB4	656	FAM294	CX-T-T-112-04	FAM294	136
TRIAL2	MB4	AB4	657	FAM294	CX-T-T-112-04	FAM294	135	272
TRIAL2	MB4	AB4	658	FAM294	CX-T-T-112-04	FAM294	121	275
TRIAL2	MB4	AB4	659	FAM248	CX-T-T-86-03	FAM248	131	272
TRIAL2	MB4	AB4	660	FAM248	CX-T-T-86-03	FAM248	133	293
TRIAL2	MB4	AB4	661	FAM248	CX-T-T-86-03	FAM248	133	286
TRIAL2	MB4	AB4	682	FAM247	CX-T-T-85-03	FAM247	121	269
TRIAL2	MB4	AB4	683	FAM247	CX-T-T-85-03	FAM247	131	286
TRIAL2	MB4	AB4	684	FAM247	CX-T-T-85-03	FAM247	133	275
TRIAL2	MB4	AB4	685	FAM278	CX-T-T-73-04	FAM278	136	286
TRIAL2	MB4	AB4	686	FAM278	CX-T-T-73-04	FAM278	133	275
TRIAL2	MB4	AB4	687	FAM278	CX-T-T-73-04	FAM278	136	270
TRIAL2	MB4	AB4	688	FAM242	CX-T-T-75-03	FAM242	134	269
TRIAL2	MB4	AB4	689	FAM242	CX-T-T-75-03	FAM242	131	275
TRIAL2	MB4	AB4	690	FAM242	CX-T-T-75-03	FAM242	134	286
TRIAL2	MB4	AB5	438	FAM216	CX-T-T-15-03	FAM216
TRIAL2	MB4	AB5	439	FAM216	CX-T-T-15-03	FAM216
TRIAL2	MB4	AB5	440	FAM216	CX-T-T-15-03	FAM216
TRIAL2	MB4	AB5	441	FAM212	CX-T-T-05-03	FAM212
TRIAL2	MB4	AB5	442	FAM212	CX-T-T-05-03	FAM212
TRIAL2	MB4	AB5	443	FAM212	CX-T-T-05-03	FAM212
TRIAL2	MB4	AB5	444	FAM280	CX-T-T-75-04	FAM280	133	278
TRIAL2	MB4	AB5	445	FAM280	CX-T-T-75-04	FAM280	133	278
TRIAL2	MB4	AB5	446	FAM280	CX-T-T-75-04	FAM280	133	286
TRIAL2	MB4	AB5	449	FAM259	CX-T-T-49-04	FAM259
TRIAL2	MB4	AB5	450	FAM259	CX-T-T-49-04	FAM259
TRIAL2	MB4	AB5	451	FAM259	CX-T-T-49-04	FAM259	137	261
TRIAL2	MB4	AB5	452	FAM302	CX-T-T-123-04	FAM302	133	293
TRIAL2	MB4	AB5	453	FAM302	CX-T-T-123-04	FAM302	114	286
TRIAL2	MB4	AB5	454	FAM302	CX-T-T-123-04	FAM302	131	288
TRIAL2	MB4	AB5	455	FAM218	CX-T-T-17-03	FAM218
TRIAL2	MB4	AB5	456	FAM218	CX-T-T-17-03	FAM218
TRIAL2	MB4	AB5	457	FAM218	CX-T-T-17-03	FAM218
TRIAL2	MB4	AB5	550		WD 2	WD 2	116	286
TRIAL2	MB4	AB5	551		WD 2	WD 2	117	293
TRIAL2	MB4	AB5	552		WD 2	WD 2	133	293
TRIAL2	MB4	AB5	553	FAM229	CX-T-T-49-03	FAM229	135	293
TRIAL2	MB4	AB5	554	FAM229	CX-T-T-49-03	FAM229	137	288
TRIAL2	MB4	AB5	555	FAM229	CX-T-T-49-03	FAM229	128	293
TRIAL2	MB4	AB5	556	FAM209	CX-T-T-01-03	FAM209
TRIAL2	MB4	AB5	557	FAM209	CX-T-T-01-03	FAM209
TRIAL2	MB4	AB5	558	FAM209	CX-T-T-01-03	FAM209
TRIAL2	MB4	AB6	429	FAM252	CX-T-T-96-03	FAM252	137
TRIAL2	MB4	AB6	430	FAM252	CX-T-T-96-03	FAM252
TRIAL2	MB4	AB6	431	FAM252	CX-T-T-96-03	FAM252
TRIAL2	MB4	AB6	432		DM 1	DM 1	131	272
TRIAL2	MB4	AB6	433		DM 1	DM 1
TRIAL2	MB4	AB6	434		DM 1	DM 1	114	278
TRIAL2	MB4	AB6	435	FAM205	CX-T-T-51-02	FAM205		286
TRIAL2	MB4	AB6	436	FAM205	CX-T-T-51-02	FAM205	132	293
TRIAL2	MB4	AB6	437	FAM205	CX-T-T-51-02	FAM205	135
TRIAL2	MB4	AB6	458	FAM289	CX-T-T-102-04	FAM289	114	289
TRIAL2	MB4	AB6	459	FAM289	CX-T-T-102-04	FAM289	123	288
TRIAL2	MB4	AB6	460	FAM289	CX-T-T-102-04	FAM289	133	286
TRIAL2	MB4	AB6	461	FAM295	CX-T-T-113-04	FAM295	134	275
TRIAL2	MB4	AB6	462	FAM295	CX-T-T-113-04	FAM295	133	288
TRIAL2	MB4	AB6	463	FAM295	CX-T-T-113-04	FAM295	133	286
TRIAL2	MB4	AB6	464	FAM276	CX-T-T-70-04	FAM276	128	286
TRIAL2	MB4	AB6	465	FAM276	CX-T-T-70-04	FAM276	137	275
TRIAL2	MB4	AB6	466	FAM276	CX-T-T-70-04	FAM276
TRIAL2	MB4	AB6	541	FAM203	CX-T-T-31-02	FAM203	128	288
TRIAL2	MB4	AB6	542	FAM203	CX-T-T-31-02	FAM203	121	286
TRIAL2	MB4	AB6	543	FAM203	CX-T-T-31-02	FAM203	115	293
TRIAL2	MB4	AB6	544	FAM245	CX-T-T-78-03	FAM245	137	272
TRIAL2	MB4	AB6	545	FAM245	CX-T-T-78-03	FAM245
TRIAL2	MB4	AB6	546	FAM245	CX-T-T-78-03	FAM245	139	288
TRIAL2	MB4	AB6	547	FAM299	CX-T-T-117-04	FAM299	133	268
TRIAL2	MB4	AB6	548	FAM299	CX-T-T-117-04	FAM299	131	278
TRIAL2	MB4	AB6	549	FAM299	CX-T-T-117-04	FAM299	114	286
TRIAL2	MB4	AB7	225	FAM256	CX-T-T-46-04	FAM256
TRIAL2	MB4	AB7	226	FAM256	CX-T-T-46-04	FAM256	135
TRIAL2	MB4	AB7	227	FAM256	CX-T-T-46-04	FAM256	111	275
TRIAL2	MB4	AB7	228	FAM202	CX-T-T-24-02	FAM202	116	293
TRIAL2	MB4	AB7	229	FAM202	CX-T-T-24-02	FAM202	113	278
TRIAL2	MB4	AB7	230	FAM202	CX-T-T-24-02	FAM202	131	286
TRIAL2	MB4	AB7	231	FAM253	CX-T-T-97-03	FAM253
TRIAL2	MB4	AB7	232	FAM253	CX-T-T-97-03	FAM253
TRIAL2	MB4	AB7	233		WD 3-5	WD 3-5	114	286
TRIAL2	MB4	AB7	326	FAM254	CX-T-T-98-03	FAM254	133	268
TRIAL2	MB4	AB7	327	FAM254	CX-T-T-98-03	FAM254	137	275
TRIAL2	MB4	AB7	328	FAM254	CX-T-T-98-03	FAM254
TRIAL2	MB4	AB7	329	FAM238	CX-T-T-67-03	FAM238	136	268
TRIAL2	MB4	AB7	330	FAM238	CX-T-T-67-03	FAM238	119	288
TRIAL2	MB4	AB7	331	FAM238	CX-T-T-67-03	FAM238	128	275
TRIAL2	MB4	AB7	332	FAM296	CX-T-T-114-04	FAM296	131	286
TRIAL2	MB4	AB7	333	FAM296	CX-T-T-114-04	FAM296
TRIAL2	MB4	AB7	334	FAM296	CX-T-T-114-04	FAM296	116	268
TRIAL2	MB4	AB7	337	FAM201	CX-T-T-23-02	FAM201	133	293
TRIAL2	MB4	AB7	338	FAM201	CX-T-T-23-02	FAM201	133	286
TRIAL2	MB4	AB7	339	FAM201	CX-T-T-23-02	FAM201	133	286
TRIAL2	MB4	AB7	340		WD 3	WD 3	114	275
TRIAL2	MB4	AB7	341		WD 3	WD 3	133	293
TRIAL2	MB4	AB7	342		WD 3	WD 3	128	293
TRIAL2	MB4	AB7	343	FAM257	CX-T-T-47-04	FAM257	131	288
TRIAL2	MB4	AB7	344	FAM257	CX-T-T-47-04	FAM257	131	293
TRIAL2	MB4	AB7	345	FAM257	CX-T-T-47-04	FAM257	135	286
TRIAL2	MB4	AB8	234	FAM246	CX-T-T-79-03	FAM246	135	286
TRIAL2	MB4	AB8	235	FAM246	CX-T-T-79-03	FAM246	133	278
TRIAL2	MB4	AB8	236	FAM246	CX-T-T-79-03	FAM246	133	268
TRIAL2	MB4	AB8	237	FAM286	CX-T-T-99-04	FAM286	113	293
TRIAL2	MB4	AB8	238	FAM286	CX-T-T-99-04	FAM286	131	286
TRIAL2	MB4	AB8	239	FAM286	CX-T-T-99-04	FAM286	128	286
TRIAL2	MB4	AB8	240	FAM273	CX-T-T-67-04	FAM273	136	275
TRIAL2	MB4	AB8	241	FAM273	CX-T-T-67-04	FAM273	135	275
TRIAL2	MB4	AB8	242	FAM273	CX-T-T-67-04	FAM273	133	272
TRIAL2	MB4	AB8	317		WD 1	WD 1	114	288
TRIAL2	MB4	AB8	318		WD 1	WD 1	134	286
TRIAL2	MB4	AB8	319		WD 1	WD 1	136	272
TRIAL2	MB4	AB8	320	FAM275	CX-T-T-69-04	FAM275	135	275
TRIAL2	MB4	AB8	321	FAM275	CX-T-T-69-04	FAM275	133
TRIAL2	MB4	AB8	322	FAM275	CX-T-T-69-04	FAM275	133	275
TRIAL2	MB4	AB8	323	FAM232	CX-T-T-52-03	FAM232	116	278
TRIAL2	MB4	AB8	324	FAM232	CX-T-T-52-03	FAM232	114	278
TRIAL2	MB4	AB8	325	FAM232	CX-T-T-52-03	FAM232	113	272
TRIAL2	MB4	AB8	346	FAM215	CX-T-T-14-03	FAM215	135	288
TRIAL2	MB4	AB8	347	FAM215	CX-T-T-14-03	FAM215	135	288
TRIAL2	MB4	AB8	348	FAM215	CX-T-T-14-03	FAM215	135	293
TRIAL2	MB4	AB8	349	FAM231	CX-T-T-51-03	FAM231
TRIAL2	MB4	AB8	350	FAM231	CX-T-T-51-03	FAM231
TRIAL2	MB4	AB8	351	FAM231	CX-T-T-51-03	FAM231
TRIAL2	MB4	AB8	352	FAM208	CX-T-T-62-02	FAM208	135	286
TRIAL2	MB4	AB8	353	FAM208	CX-T-T-62-02	FAM208
TRIAL2	MB4	AB8	354	FAM208	CX-T-T-62-02	FAM208	113	293
TRIAL2	MB4	AB9	102	FAM300	CX-T-T-121-04	FAM300	137	288
TRIAL2	MB4	AB9	103	FAM300	CX-T-T-121-04	FAM300	124	278
TRIAL2	MB4	AB9	104	FAM300	CX-T-T-121-04	FAM300	124	272
TRIAL2	MB4	AB9	105	FAM214	CX-T-T-12-03	FAM214
TRIAL2	MB4	AB9	106	FAM214	CX-T-T-12-03	FAM214	137	272
TRIAL2	MB4	AB9	107	FAM214	CX-T-T-12-03	FAM214
TRIAL2	MB4	AB9	108	FAM301	CX-T-T-122-04	FAM301	136	286
TRIAL2	MB4	AB9	109	FAM301	CX-T-T-122-04	FAM301
TRIAL2	MB4	AB9	110	FAM301	CX-T-T-122-04	FAM301
TRIAL2	MB4	AB9	113	FAM240	CX-T-T-72-03	FAM240	131	275
TRIAL2	MB4	AB9	114	FAM240	CX-T-T-72-03	FAM240	136	286
TRIAL2	MB4	AB9	115	FAM240	CX-T-T-72-03	FAM240	137	264
TRIAL2	MB4	AB9	116		DM 2	DM 2	114	275
TRIAL2	MB4	AB9	117		DM 2	DM 2	112	272
TRIAL2	MB4	AB9	118		DM 2	DM 2	137	269
TRIAL2	MB4	AB9	119		WD 1	WD 1	114	281
TRIAL2	MB4	AB9	120		WD 1	WD 1	115	275
TRIAL2	MB4	AB9	121		WD 1	WD 1	131	275
TRIAL2	MB4	AB9	214	FAM283	CX-T-T-78-04	FAM283	135	286
TRIAL2	MB4	AB9	215	FAM283	CX-T-T-78-04	FAM283	120	272
TRIAL2	MB4	AB9	216	FAM283	CX-T-T-78-04	FAM283	119	275
TRIAL2	MB4	AB9	217		WD 3-5	WD 3-5	114	286
TRIAL2	MB4	AB9	218	FAM226	CX-T-T-26-03	FAM226	150
TRIAL2	MB4	AB9	219	FAM226	CX-T-T-26-03	FAM226	125
TRIAL2	MB4	AB9	220	FAM213	CX-T-T-11-03	FAM213	135	268
TRIAL2	MB4	AB9	221	FAM213	CX-T-T-11-03	FAM213
TRIAL2	MB4	AB9	222	FAM213	CX-T-T-11-03	FAM213
TRIAL2	MB5	AB1	756	FAM245	CX-T-T-78-03	FAM245	135	278
TRIAL2	MB5	AB1	757	FAM245	CX-T-T-78-03	FAM245	139	286
TRIAL2	MB5	AB1	758	FAM245	CX-T-T-78-03	FAM245	136	286
TRIAL2	MB5	AB1	759	FAM209	CX-T-T-01-03	FAM209	137	269
TRIAL2	MB5	AB1	760	FAM209	CX-T-T-01-03	FAM209
TRIAL2	MB5	AB1	761	FAM209	CX-T-T-01-03	FAM209
TRIAL2	MB5	AB1	762	FAM208	CX-T-T-62-02	FAM208	117	268
TRIAL2	MB5	AB1	763	FAM208	CX-T-T-62-02	FAM208
TRIAL2	MB5	AB1	764	FAM208	CX-T-T-62-02	FAM208
TRIAL2	MB5	AB1	803	FAM239	CX-T-T-70-03	FAM239	133	286
TRIAL2	MB5	AB1	804	FAM239	CX-T-T-70-03	FAM239
TRIAL2	MB5	AB1	805	FAM239	CX-T-T-70-03	FAM239	132	272
TRIAL2	MB5	AB1	806	FAM259	CX-T-T-49-04	FAM259
TRIAL2	MB5	AB1	807	FAM259	CX-T-T-49-04	FAM259
TRIAL2	MB5	AB1	808	FAM259	CX-T-T-49-04	FAM259
TRIAL2	MB5	AB1	809	FAM242	CX-T-T-75-03	FAM242	131	293
TRIAL2	MB5	AB1	810	FAM242	CX-T-T-75-03	FAM242	133	293
TRIAL2	MB5	AB1	811	FAM242	CX-T-T-75-03	FAM242	128	293
TRIAL2	MB5	AB1	868	FAM243	CX-T-T-76-03	FAM243
TRIAL2	MB5	AB1	869	FAM243	CX-T-T-76-03	FAM243
TRIAL2	MB5	AB1	870	FAM243	CX-T-T-76-03	FAM243
TRIAL2	MB5	AB1	871	FAM233	CX-T-T-61-03	FAM233	137	278
TRIAL2	MB5	AB1	872	FAM233	CX-T-T-61-03	FAM233	137
TRIAL2	MB5	AB1	873	FAM233	CX-T-T-61-03	FAM233	134	286
TRIAL2	MB5	AB1	874	FAM240	CX-T-T-72-03	FAM240
TRIAL2	MB5	AB1	875	FAM240	CX-T-T-72-03	FAM240	133	275
TRIAL2	MB5	AB1	876	FAM240	CX-T-T-72-03	FAM240	137	286
TRIAL2	MB5	AB10	75		WD 3-5	WD 3-5	119	293
TRIAL2	MB5	AB10	76		WD 3-5	WD 3-5	112	293
TRIAL2	MB5	AB10	77		WD 3-5	WD 3-5	112	293
TRIAL2	MB5	AB10	78	FAM294	CX-T-T-112-04	FAM294	122	286
TRIAL2	MB5	AB10	79	FAM294	CX-T-T-112-04	FAM294	121	278
TRIAL2	MB5	AB10	80	FAM294	CX-T-T-112-04	FAM294	131	278
TRIAL2	MB5	AB10	81	FAM288	CX-T-T-101-04	FAM288	116	293
TRIAL2	MB5	AB10	82	FAM288	CX-T-T-101-04	FAM288	122	275
TRIAL2	MB5	AB10	83	FAM288	CX-T-T-101-04	FAM288	119	286
TRIAL2	MB5	AB10	140	FAM254	CX-T-T-98-03	FAM254	136	275
TRIAL2	MB5	AB10	141	FAM254	CX-T-T-98-03	FAM254	155
TRIAL2	MB5	AB10	142	FAM254	CX-T-T-98-03	FAM254	137	275
TRIAL2	MB5	AB10	143	FAM261	CX-T-T-51-04	FAM261	131	286
TRIAL2	MB5	AB10	144	FAM261	CX-T-T-51-04	FAM261	130	275
TRIAL2	MB5	AB10	145	FAM261	CX-T-T-51-04	FAM261	134	275
TRIAL2	MB5	AB10	146	FAM301	CX-T-T-122-04	FAM301	131	288
TRIAL2	MB5	AB10	147	FAM301	CX-T-T-122-04	FAM301
TRIAL2	MB5	AB10	148	FAM301	CX-T-T-122-04	FAM301	136	293
TRIAL2	MB5	AB10	187	FAM275	CX-T-T-69-04	FAM275
TRIAL2	MB5	AB10	188	FAM275	CX-T-T-69-04	FAM275	135	269
TRIAL2	MB5	AB10	189	FAM275	CX-T-T-69-04	FAM275	135	286
TRIAL2	MB5	AB10	190	FAM280	CX-T-T-75-04	FAM280	131	278
TRIAL2	MB5	AB10	191	FAM280	CX-T-T-75-04	FAM280	114	278
TRIAL2	MB5	AB10	192	FAM280	CX-T-T-75-04	FAM280	129	286
TRIAL2	MB5	AB10	193	FAM241	CX-T-T-73-03	FAM241	128	293
TRIAL2	MB5	AB10	194	FAM241	CX-T-T-73-03	FAM241	133	288
TRIAL2	MB5	AB10	195	FAM241	CX-T-T-73-03	FAM241	128	293
TRIAL2	MB5	AB2	747	FAM249	CX-T-T-93-03	FAM249	135	293
TRIAL2	MB5	AB2	748	FAM249	CX-T-T-93-03	FAM249	131	286
TRIAL2	MB5	AB2	749	FAM249	CX-T-T-93-03	FAM249	131	286
TRIAL2	MB5	AB2	750	FAM263	CX-T-T-53-04	FAM263	128	272
TRIAL2	MB5	AB2	751	FAM263	CX-T-T-53-04	FAM263	133	272
TRIAL2	MB5	AB2	752	FAM263	CX-T-T-53-04	FAM263	133	272
TRIAL2	MB5	AB2	753		WD 1	WD 1	114	286
TRIAL2	MB5	AB2	754		WD 1	WD 1	121	278
TRIAL2	MB5	AB2	755		WD 1	WD 1	121	278
TRIAL2	MB5	AB2	812	FAM248	CX-T-T-86-03	FAM248	122	275
TRIAL2	MB5	AB2	813	FAM248	CX-T-T-86-03	FAM248	137	275
TRIAL2	MB5	AB2	814	FAM248	CX-T-T-86-03	FAM248	131	275
TRIAL2	MB5	AB2	815	FAM273	CX-T-T-67-04	FAM273	128	261
TRIAL2	MB5	AB2	816	FAM273	CX-T-T-67-04	FAM273	133	272
TRIAL2	MB5	AB2	817	FAM273	CX-T-T-67-04	FAM273	133	272
TRIAL2	MB5	AB2	818	FAM210	CX-T-T-02-03	FAM210
TRIAL2	MB5	AB2	819	FAM210	CX-T-T-02-03	FAM210
TRIAL2	MB5	AB2	820	FAM210	CX-T-T-02-03	FAM210	138	268
TRIAL2	MB5	AB2	859	FAM201	CX-T-T-23-02	FAM201	136	278
TRIAL2	MB5	AB2	860	FAM201	CX-T-T-23-02	FAM201	134	275
TRIAL2	MB5	AB2	861	FAM201	CX-T-T-23-02	FAM201	133	286
TRIAL2	MB5	AB2	862	FAM221	CX-T-T-20-03	FAM221	133	275
TRIAL2	MB5	AB2	863	FAM221	CX-T-T-20-03	FAM221	136	275
TRIAL2	MB5	AB2	864	FAM221	CX-T-T-20-03	FAM221	133	278
TRIAL2	MB5	AB2	865	FAM212	CX-T-T-05-03	FAM212
TRIAL2	MB5	AB2	866	FAM212	CX-T-T-05-03	FAM212
TRIAL2	MB5	AB2	867	FAM212	CX-T-T-05-03	FAM212
TRIAL2	MB5	AB3	579	FAM296	CX-T-T-114-04	FAM296	124	286
TRIAL2	MB5	AB3	580	FAM296	CX-T-T-114-04	FAM296	119	275
TRIAL2	MB5	AB3	581	FAM296	CX-T-T-114-04	FAM296	121	275
TRIAL2	MB5	AB3	582	FAM215	CX-T-T-14-03	FAM215
TRIAL2	MB5	AB3	583	FAM215	CX-T-T-14-03	FAM215	135	275
TRIAL2	MB5	AB3	584	FAM215	CX-T-T-14-03	FAM215	136	293
TRIAL2	MB5	AB3	585		WD 3-5	WD 3-5	131	286
TRIAL2	MB5	AB3	586		WD 3-5	WD 3-5	131	275
TRIAL2	MB5	AB3	587		WD 3-5	WD 3-5
TRIAL2	MB5	AB3	644	FAM278	CX-T-T-73-04	FAM278	133	275
TRIAL2	MB5	AB3	645	FAM278	CX-T-T-73-04	FAM278	130	278
TRIAL2	MB5	AB3	646	FAM278	CX-T-T-73-04	FAM278	131	281
TRIAL2	MB5	AB3	647	FAM203	CX-T-T-31-02	FAM203	119	269
TRIAL2	MB5	AB3	648	FAM203	CX-T-T-31-02	FAM203	135	293
TRIAL2	MB5	AB3	649	FAM203	CX-T-T-31-02	FAM203	139
TRIAL2	MB5	AB3	650	FAM214	CX-T-T-12-03	FAM214	135	268
TRIAL2	MB5	AB3	651	FAM214	CX-T-T-12-03	FAM214	139	264
TRIAL2	MB5	AB3	652	FAM214	CX-T-T-12-03	FAM214
TRIAL2	MB5	AB3	691	FAM257	CX-T-T-47-04	FAM257	137	272
TRIAL2	MB5	AB3	692	FAM257	CX-T-T-47-04	FAM257	134	278
TRIAL2	MB5	AB3	693	FAM257	CX-T-T-47-04	FAM257	136	272
TRIAL2	MB5	AB3	694	FAM293	CX-T-T-108-04	FAM293	121	275
TRIAL2	MB5	AB3	695	FAM293	CX-T-T-108-04	FAM293	119	281
TRIAL2	MB5	AB3	696	FAM293	CX-T-T-108-04	FAM293	119	269
TRIAL2	MB5	AB3	697	FAM204	CX-T-T-36-02	FAM204	131	275
TRIAL2	MB5	AB3	698	FAM204	CX-T-T-36-02	FAM204	134	269
TRIAL2	MB5	AB3	699	FAM204	CX-T-T-36-02	FAM204	121	268
TRIAL2	MB5	AB4	588	FAM237	CX-T-T-66-03	FAM237	131	294
TRIAL2	MB5	AB4	589	FAM237	CX-T-T-66-03	FAM237	121	286
TRIAL2	MB5	AB4	590	FAM237	CX-T-T-66-03	FAM237	130	288
TRIAL2	MB5	AB4	591	FAM279	CX-T-T-74-04	FAM279	131	293
TRIAL2	MB5	AB4	592	FAM279	CX-T-T-74-04	FAM279	131	288
TRIAL2	MB5	AB4	593	FAM279	CX-T-T-74-04	FAM279	131	286
TRIAL2	MB5	AB4	594	FAM276	CX-T-T-70-04	FAM276	128	272
TRIAL2	MB5	AB4	595	FAM276	CX-T-T-70-04	FAM276
TRIAL2	MB5	AB4	596	FAM276	CX-T-T-70-04	FAM276	131	278
TRIAL2	MB5	AB4	635		WD 2	WD 2	137	286
TRIAL2	MB5	AB4	636		WD 2	WD 2	130	286
TRIAL2	MB5	AB4	637		WD 2	WD 2	124	275
TRIAL2	MB5	AB4	638	FAM222	CX-T-T-22-03	FAM222	133	293
TRIAL2	MB5	AB4	639	FAM222	CX-T-T-22-03	FAM222	133	272
TRIAL2	MB5	AB4	640	FAM222	CX-T-T-22-03	FAM222	130	281
TRIAL2	MB5	AB4	641	FAM232	CX-T-T-52-03	FAM232	120	275
TRIAL2	MB5	AB4	642	FAM232	CX-T-T-52-03	FAM232	119	272
TRIAL2	MB5	AB4	643	FAM232	CX-T-T-52-03	FAM232	135
TRIAL2	MB5	AB4	700	FAM207	CX-T-T-61-02	FAM207
TRIAL2	MB5	AB4	701	FAM207	CX-T-T-61-02	FAM207	113	278
TRIAL2	MB5	AB4	702	FAM207	CX-T-T-61-02	FAM207
TRIAL2	MB5	AB4	703	FAM230	CX-T-T-50-03	FAM230
TRIAL2	MB5	AB4	704	FAM230	CX-T-T-50-03	FAM230
TRIAL2	MB5	AB4	705	FAM230	CX-T-T-50-03	FAM230
TRIAL2	MB5	AB4	706	FAM202	CX-T-T-24-02	FAM202	121	286
TRIAL2	MB5	AB4	707	FAM202	CX-T-T-24-02	FAM202	121	278
TRIAL2	MB5	AB4	708	FAM202	CX-T-T-24-02	FAM202	121	269
TRIAL2	MB5	AB5	420		3238	3238	137	278
TRIAL2	MB5	AB5	421		3238	3238	137	278
TRIAL2	MB5	AB5	422		3238	3238
TRIAL2	MB5	AB5	423	FAM213	CX-T-T-11-03	FAM213
TRIAL2	MB5	AB5	424	FAM213	CX-T-T-11-03	FAM213
TRIAL2	MB5	AB5	425	FAM213	CX-T-T-11-03	FAM213
TRIAL2	MB5	AB5	426	FAM205	CX-T-T-51-02	FAM205
TRIAL2	MB5	AB5	427	FAM205	CX-T-T-51-02	FAM205
TRIAL2	MB5	AB5	428	FAM205	CX-T-T-51-02	FAM205
TRIAL2	MB5	AB5	467	FAM228	CX-T-T-48-03	FAM228	135	278
TRIAL2	MB5	AB5	468	FAM228	CX-T-T-48-03	FAM228	137	293
TRIAL2	MB5	AB5	469	FAM228	CX-T-T-48-03	FAM228	131	268
TRIAL2	MB5	AB5	470	FAM297	CX-T-T-115-04	FAM297	131	286
TRIAL2	MB5	AB5	471	FAM297	CX-T-T-115-04	FAM297
TRIAL2	MB5	AB5	472	FAM297	CX-T-T-115-04	FAM297	131	293
TRIAL2	MB5	AB5	473	FAM238	CX-T-T-67-03	FAM238
TRIAL2	MB5	AB5	474	FAM238	CX-T-T-67-03	FAM238	115	286
TRIAL2	MB5	AB5	475	FAM238	CX-T-T-67-03	FAM238
TRIAL2	MB5	AB5	532	FAM219	CX-T-T-19-03	FAM219	135	278
TRIAL2	MB5	AB5	533	FAM219	CX-T-T-19-03	FAM219	133	286
TRIAL2	MB5	AB5	534	FAM219	CX-T-T-19-03	FAM219	134	275
TRIAL2	MB5	AB5	535	FAM260	CX-T-T-50-04	FAM260
TRIAL2	MB5	AB5	536	FAM260	CX-T-T-50-04	FAM260
TRIAL2	MB5	AB5	537	FAM260	CX-T-T-50-04	FAM260
TRIAL2	MB5	AB5	538	FAM287	CX-T-T-100-04	FAM287	131	278
TRIAL2	MB5	AB5	539	FAM287	CX-T-T-100-04	FAM287	131	278
TRIAL2	MB5	AB5	540	FAM287	CX-T-T-100-04	FAM287	116	286
TRIAL2	MB5	AB6	411	FAM298	CX-T-T-116-04	FAM298	128	286
TRIAL2	MB5	AB6	412	FAM298	CX-T-T-116-04	FAM298	133	268
TRIAL2	MB5	AB6	413	FAM298	CX-T-T-116-04	FAM298	133	275
TRIAL2	MB5	AB6	414	FAM218	CX-T-T-17-03	FAM218
TRIAL2	MB5	AB6	415	FAM218	CX-T-T-17-03	FAM218
TRIAL2	MB5	AB6	476	FAM283	CX-T-T-78-04	FAM283	136	278
TRIAL2	MB5	AB6	477	FAM283	CX-T-T-78-04	FAM283	133	278
TRIAL2	MB5	AB6	478	FAM283	CX-T-T-78-04	FAM283	135	293
TRIAL2	MB5	AB6	479		DM 2	DM 2	131	278
TRIAL2	MB5	AB6	480		DM 2	DM 2	117	275
TRIAL2	MB5	AB6	481		DM 2	DM 2	133	278
TRIAL2	MB5	AB6	482	FAM255	CX-T-T-99-03	FAM255
TRIAL2	MB5	AB6	483	FAM255	CX-T-T-99-03	FAM255	137	278
TRIAL2	MB5	AB6	484	FAM255	CX-T-T-99-03	FAM255	137	286
TRIAL2	MB5	AB6	523	FAM244	CX-T-T-77-03	FAM244	113	293
TRIAL2	MB5	AB6	524	FAM244	CX-T-T-77-03	FAM244	133	275
TRIAL2	MB5	AB6	525	FAM244	CX-T-T-77-03	FAM244	121	286
TRIAL2	MB5	AB6	526	FAM234	CX-T-T-63-03	FAM234	116	286
TRIAL2	MB5	AB6	527	FAM234	CX-T-T-63-03	FAM234	131	272
TRIAL2	MB5	AB6	528	FAM234	CX-T-T-63-03	FAM234	133	286
TRIAL2	MB5	AB6	529		WD 1	WD 1	116	286
TRIAL2	MB5	AB6	530		WD 1	WD 1	119	286
TRIAL2	MB5	AB6	531		WD 1	WD 1	133	278
TRIAL2	MB5	AB7	243	FAM235	CX-T-T-64-03	FAM235	135	288
TRIAL2	MB5	AB7	244	FAM235	CX-T-T-64-03	FAM235
TRIAL2	MB5	AB7	245	FAM235	CX-T-T-64-03	FAM235
TRIAL2	MB5	AB7	246	FAM216	CX-T-T-15-03	FAM216
TRIAL2	MB5	AB7	247	FAM216	CX-T-T-15-03	FAM216
TRIAL2	MB5	AB7	248	FAM216	CX-T-T-15-03	FAM216
TRIAL2	MB5	AB7	249		3236	3236
TRIAL2	MB5	AB7	250		3236	3236
TRIAL2	MB5	AB7	251		3236	3236	132	275
TRIAL2	MB5	AB7	308	FAM300	CX-T-T-121-04	FAM300	121	278
TRIAL2	MB5	AB7	309	FAM300	CX-T-T-121-04	FAM300	114	293
TRIAL2	MB5	AB7	310	FAM300	CX-T-T-121-04	FAM300	114	286
TRIAL2	MB5	AB7	311	FAM285	CX-T-T-98-04	FAM285	112	293
TRIAL2	MB5	AB7	312	FAM285	CX-T-T-98-04	FAM285	113	293
TRIAL2	MB5	AB7	313	FAM285	CX-T-T-98-04	FAM285	124	293
TRIAL2	MB5	AB7	314		WD 3	WD 3	137	286
TRIAL2	MB5	AB7	315		WD 3	WD 3	137	288
TRIAL2	MB5	AB7	316		WD 3	WD 3
TRIAL2	MB5	AB7	355	FAM289	CX-T-T-102-04	FAM289	131	293
TRIAL2	MB5	AB7	356	FAM289	CX-T-T-102-04	FAM289	124	286
TRIAL2	MB5	AB7	357	FAM289	CX-T-T-102-04	FAM289	121	288
TRIAL2	MB5	AB7	358		DM 3	DM 3	128	269
TRIAL2	MB5	AB7	359		DM 3	DM 3	114	278
TRIAL2	MB5	AB7	360		DM 3	DM 3	133	272
TRIAL2	MB5	AB7	361	FAM206	CX-T-T-52-02	FAM206
TRIAL2	MB5	AB7	362	FAM206	CX-T-T-52-02	FAM206	131	268
TRIAL2	MB5	AB7	363	FAM206	CX-T-T-52-02	FAM206
TRIAL2	MB5	AB8	252	FAM299	CX-T-T-117-04	FAM299		288
TRIAL2	MB5	AB8	253	FAM299	CX-T-T-117-04	FAM299	133	278
TRIAL2	MB5	AB8	254		WD 3-4	WD 3-4	114	272
TRIAL2	MB5	AB8	255		8073	8073
TRIAL2	MB5	AB8	256		3236	3236
TRIAL2	MB5	AB8	257		3236	3236
TRIAL2	MB5	AB8	258		3239	3239	131	275
TRIAL2	MB5	AB8	259		3239	3239
TRIAL2	MB5	AB8	260		3239	3239	114	293
TRIAL2	MB5	AB8	299	FAM262	CX-T-T-52-04	FAM262	131	278
TRIAL2	MB5	AB8	300	FAM262	CX-T-T-52-04	FAM262	130	286
TRIAL2	MB5	AB8	301	FAM262	CX-T-T-52-04	FAM262	133	275
TRIAL2	MB5	AB8	302	FAM302	CX-T-T-123-04	FAM302	135	275
TRIAL2	MB5	AB8	303	FAM302	CX-T-T-123-04	FAM302	137	281
TRIAL2	MB5	AB8	304	FAM302	CX-T-T-123-04	FAM302	135	293
TRIAL2	MB5	AB8	305	FAM292	CX-T-T-107-04	FAM292	137	272
TRIAL2	MB5	AB8	306	FAM292	CX-T-T-107-04	FAM292	133	278
TRIAL2	MB5	AB8	307	FAM292	CX-T-T-107-04	FAM292	115	278
TRIAL2	MB5	AB8	364	FAM246	CX-T-T-79-03	FAM246	134	268
TRIAL2	MB5	AB8	365	FAM246	CX-T-T-79-03	FAM246	135	278
TRIAL2	MB5	AB8	366	FAM246	CX-T-T-79-03	FAM246	131	275
TRIAL2	MB5	AB8	367	FAM231	CX-T-T-51-03	FAM231
TRIAL2	MB5	AB8	368	FAM231	CX-T-T-51-03	FAM231
TRIAL2	MB5	AB8	369	FAM231	CX-T-T-51-03	FAM231
TRIAL2	MB5	AB8	370	FAM247	CX-T-T-85-03	FAM247	119	275
TRIAL2	MB5	AB8	371	FAM247	CX-T-T-85-03	FAM247	135	293
TRIAL2	MB5	AB8	372	FAM247	CX-T-T-85-03	FAM247	131	275
TRIAL2	MB5	AB9	84	FAM236	CX-T-T-65-03	FAM236	128	270
TRIAL2	MB5	AB9	85	FAM236	CX-T-T-65-03	FAM236	131	281
TRIAL2	MB5	AB9	86	FAM236	CX-T-T-65-03	FAM236	113	293
TRIAL2	MB5	AB9	87	FAM272	CX-T-T-66-04	FAM272
TRIAL2	MB5	AB9	88	FAM272	CX-T-T-66-04	FAM272
TRIAL2	MB5	AB9	89	FAM272	CX-T-T-66-04	FAM272
TRIAL2	MB5	AB9	90		3241	3241
TRIAL2	MB5	AB9	91		3241	3241	135	275
TRIAL2	MB5	AB9	92		3241	3241
TRIAL2	MB5	AB9	131		DM 1	DM 1	135	288
TRIAL2	MB5	AB9	132		DM 1	DM 1	128	286
TRIAL2	MB5	AB9	133		DM 1	DM 1	119	269
TRIAL2	MB5	AB9	134	FAM295	CX-T-T-113-04	FAM295	115	275
TRIAL2	MB5	AB9	135	FAM295	CX-T-T-113-04	FAM295	128	288
TRIAL2	MB5	AB9	136	FAM295	CX-T-T-113-04	FAM295	113	286
TRIAL2	MB5	AB9	137	FAM277	CX-T-T-72-04	FAM277	133	275
TRIAL2	MB5	AB9	138	FAM277	CX-T-T-72-04	FAM277	117	278
TRIAL2	MB5	AB9	139	FAM277	CX-T-T-72-04	FAM277	133	275
TRIAL2	MB5	AB9	196	FAM258	CX-T-T-48-04	FAM258
TRIAL2	MB5	AB9	197	FAM258	CX-T-T-48-04	FAM258	137	278
TRIAL2	MB5	AB9	198	FAM258	CX-T-T-48-04	FAM258	130	288
TRIAL2	MB5	AB9	199	FAM223	CX-T-T-23-03	FAM223
TRIAL2	MB5	AB9	200	FAM223	CX-T-T-23-03	FAM223
TRIAL2	MB5	AB9	201	FAM223	CX-T-T-23-03	FAM223
TRIAL2	MB5	AB9	202	FAM286	CX-T-T-99-04	FAM286	116	293
TRIAL2	MB5	AB9	203	FAM286	CX-T-T-99-04	FAM286	131	286
TRIAL2	MB5	AB9	204	FAM286	CX-T-T-99-04	FAM286	122	278
TRIAL2	MB6	AB1	738		3216	3216	119	275
TRIAL2	MB6	AB1	739		3216	3216	133	286
TRIAL2	MB6	AB1	740		3216	3216	133	286
TRIAL2	MB6	AB1	741		3211	3211	133	278
TRIAL2	MB6	AB1	742		3211	3211	131	275
TRIAL2	MB6	AB1	743		3211	3211	128	275
TRIAL2	MB6	AB1	744	FAM234	CX-T-T-63-03	FAM234
TRIAL2	MB6	AB1	745	FAM234	CX-T-T-63-03	FAM234	133
TRIAL2	MB6	AB1	746	FAM234	CX-T-T-63-03	FAM234	136
TRIAL2	MB6	AB1	821	FAM231	CX-T-T-51-03	FAM231
TRIAL2	MB6	AB1	822	FAM231	CX-T-T-51-03	FAM231
TRIAL2	MB6	AB1	823	FAM231	CX-T-T-51-03	FAM231
TRIAL2	MB6	AB1	824	FAM280	CX-T-T-75-04	FAM280	121	293
TRIAL2	MB6	AB1	825	FAM280	CX-T-T-75-04	FAM280	128	293
TRIAL2	MB6	AB1	826	FAM280	CX-T-T-75-04	FAM280	133	293
TRIAL2	MB6	AB1	827	FAM201	CX-T-T-23-02	FAM201	126	286
TRIAL2	MB6	AB1	828	FAM201	CX-T-T-23-02	FAM201	133	299
TRIAL2	MB6	AB1	829	FAM201	CX-T-T-23-02	FAM201	133	278
TRIAL2	MB6	AB1	850		DM 1	DM 1
TRIAL2	MB6	AB1	851		DM 1	DM 1	131	293
TRIAL2	MB6	AB1	852		DM 1	DM 1	121	272
TRIAL2	MB6	AB1	853	FAM297	CX-T-T-115-04	FAM297	121	286
TRIAL2	MB6	AB1	854	FAM297	CX-T-T-115-04	FAM297	133	293
TRIAL2	MB6	AB1	855	FAM297	CX-T-T-115-04	FAM297	130	286
TRIAL2	MB6	AB1	856	FAM242	CX-T-T-75-03	FAM242	133	293
TRIAL2	MB6	AB1	857	FAM242	CX-T-T-75-03	FAM242	121	293
TRIAL2	MB6	AB1	858	FAM242	CX-T-T-75-03	FAM242	131	272
TRIAL2	MB6	AB10	57	FAM248	CX-T-T-86-03	FAM248	122	272
TRIAL2	MB6	AB10	58	FAM248	CX-T-T-86-03	FAM248	131	272
TRIAL2	MB6	AB10	59	FAM248	CX-T-T-86-03	FAM248	131	272
TRIAL2	MB6	AB10	60	FAM232	CX-T-T-52-03	FAM232	116	275
TRIAL2	MB6	AB10	61	FAM232	CX-T-T-52-03	FAM232
TRIAL2	MB6	AB10	62	FAM232	CX-T-T-52-03	FAM232	122	288
TRIAL2	MB6	AB10	63	FAM205	CX-T-T-51-02	FAM205
TRIAL2	MB6	AB10	64	FAM205	CX-T-T-51-02	FAM205
TRIAL2	MB6	AB10	65	FAM205	CX-T-T-51-02	FAM205
TRIAL2	MB6	AB10	158	FAM235	CX-T-T-64-03	FAM235
TRIAL2	MB6	AB10	159	FAM235	CX-T-T-64-03	FAM235
TRIAL2	MB6	AB10	160	FAM235	CX-T-T-64-03	FAM235
TRIAL2	MB6	AB10	161	FAM233	CX-T-T-61-03	FAM233	134	269
TRIAL2	MB6	AB10	162	FAM233	CX-T-T-61-03	FAM233	131	272
TRIAL2	MB6	AB10	163	FAM233	CX-T-T-61-03	FAM233	128	272
TRIAL2	MB6	AB10	164	FAM292	CX-T-T-107-04	FAM292	131	268
TRIAL2	MB6	AB10	165	FAM292	CX-T-T-107-04	FAM292	137
TRIAL2	MB6	AB10	166	FAM292	CX-T-T-107-04	FAM292	134	275
TRIAL2	MB6	AB10	169		WD 3-5	WD 3-5
TRIAL2	MB6	AB10	170		WD 3-5	WD 3-5	136	269
TRIAL2	MB6	AB10	171		WD 3-5	WD 3-5	115	288
TRIAL2	MB6	AB10	172		WD 3-5	WD 3-5	115	288
TRIAL2	MB6	AB10	173		WD 3-5	WD 3-5	114	293
TRIAL2	MB6	AB10	174		WD 3-5	WD 3-5
TRIAL2	MB6	AB10	175	FAM257	CX-T-T-47-04	FAM257	133	288
TRIAL2	MB6	AB10	176	FAM257	CX-T-T-47-04	FAM257	134	272
TRIAL2	MB6	AB10	177	FAM257	CX-T-T-47-04	FAM257	133	293
TRIAL2	MB6	AB2	729		3209	3209
TRIAL2	MB6	AB2	730		3209	3209	131	286
TRIAL2	MB6	AB2	731		3209	3209
TRIAL2	MB6	AB2	732	FAM254	CX-T-T-98-03	FAM254	133	286
TRIAL2	MB6	AB2	733	FAM254	CX-T-T-98-03	FAM254	137	293
TRIAL2	MB6	AB2	734	FAM254	CX-T-T-98-03	FAM254	137	286
TRIAL2	MB6	AB2	735	FAM207	CX-T-T-61-02	FAM207
TRIAL2	MB6	AB2	736	FAM207	CX-T-T-61-02	FAM207
TRIAL2	MB6	AB2	737	FAM207	CX-T-T-61-02	FAM207	142	269
TRIAL2	MB6	AB2	830	FAM203	CX-T-T-31-02	FAM203	121	286
TRIAL2	MB6	AB2	831	FAM203	CX-T-T-31-02	FAM203	134	295
TRIAL2	MB6	AB2	832	FAM203	CX-T-T-31-02	FAM203	115	278
TRIAL2	MB6	AB2	833	FAM272	CX-T-T-66-04	FAM272
TRIAL2	MB6	AB2	834	FAM272	CX-T-T-66-04	FAM272
TRIAL2	MB6	AB2	835	FAM272	CX-T-T-66-04	FAM272	137
TRIAL2	MB6	AB2	836	FAM221	CX-T-T-20-03	FAM221		269
TRIAL2	MB6	AB2	837	FAM221	CX-T-T-20-03	FAM221	133	286
TRIAL2	MB6	AB2	838	FAM221	CX-T-T-20-03	FAM221
TRIAL2	MB6	AB2	841	FAM213	CX-T-T-11-03	FAM213
TRIAL2	MB6	AB2	842	FAM213	CX-T-T-11-03	FAM213
TRIAL2	MB6	AB2	843	FAM213	CX-T-T-11-03	FAM213	136	269
TRIAL2	MB6	AB2	844	FAM206	CX-T-T-52-02	FAM206
TRIAL2	MB6	AB2	845	FAM206	CX-T-T-52-02	FAM206
TRIAL2	MB6	AB2	846	FAM206	CX-T-T-52-02	FAM206	133	275
TRIAL2	MB6	AB2	847	FAM218	CX-T-T-17-03	FAM218
TRIAL2	MB6	AB2	848	FAM218	CX-T-T-17-03	FAM218
TRIAL2	MB6	AB2	849	FAM218	CX-T-T-17-03	FAM218
TRIAL2	MB6	AB3	597	FAM286	CX-T-T-99-04	FAM286	113	293
TRIAL2	MB6	AB3	598	FAM286	CX-T-T-99-04	FAM286	113	278
TRIAL2	MB6	AB3	599	FAM286	CX-T-T-99-04	FAM286	129	278
TRIAL2	MB6	AB3	600	FAM294	CX-T-T-112-04	FAM294	133	275
TRIAL2	MB6	AB3	601	FAM294	CX-T-T-112-04	FAM294	135	286
TRIAL2	MB6	AB3	602	FAM294	CX-T-T-112-04	FAM294	131	275
TRIAL2	MB6	AB3	603	FAM262	CX-T-T-52-04	FAM262	131	286
TRIAL2	MB6	AB3	604	FAM262	CX-T-T-52-04	FAM262	121	288
TRIAL2	MB6	AB3	605	FAM262	CX-T-T-52-04	FAM262	133	286
TRIAL2	MB6	AB3	626	FAM293	CX-T-T-108-04	FAM293	113	286
TRIAL2	MB6	AB3	627	FAM293	CX-T-T-108-04	FAM293	130	293
TRIAL2	MB6	AB3	628	FAM293	CX-T-T-108-04	FAM293	124	278
TRIAL2	MB6	AB3	629		DM 2	DM 2	113	278
TRIAL2	MB6	AB3	630		DM 2	DM 2	133	269
TRIAL2	MB6	AB3	631		DM 2	DM 2	124	269
TRIAL2	MB6	AB3	632	FAM243	CX-T-T-76-03	FAM243	133
TRIAL2	MB6	AB3	633	FAM243	CX-T-T-76-03	FAM243	116	264
TRIAL2	MB6	AB3	634	FAM243	CX-T-T-76-03	FAM243	132
TRIAL2	MB6	AB3	709		WD 3	WD 3	119	288
TRIAL2	MB6	AB3	710		WD 3	WD 3	121	293
TRIAL2	MB6	AB3	711		WD 3	WD 3
TRIAL2	MB6	AB3	712		WD 2	WD 2	114	275
TRIAL2	MB6	AB3	713		WD 2	WD 2	114	275
TRIAL2	MB6	AB3	714		WD 2	WD 2	119	286
TRIAL2	MB6	AB3	715	FAM260	CX-T-T-50-04	FAM260	119	269
TRIAL2	MB6	AB3	716	FAM260	CX-T-T-50-04	FAM260
TRIAL2	MB6	AB3	717	FAM260	CX-T-T-50-04	FAM260
TRIAL2	MB6	AB4	606		WD 1	WD 1	113	286
TRIAL2	MB6	AB4	607		WD 1	WD 1	115	286
TRIAL2	MB6	AB4	608		WD 1	WD 1	114	286
TRIAL2	MB6	AB4	609	FAM230	CX-T-T-50-03	FAM230
TRIAL2	MB6	AB4	610	FAM230	CX-T-T-50-03	FAM230		272
TRIAL2	MB6	AB4	611	FAM230	CX-T-T-50-03	FAM230
TRIAL2	MB6	AB4	617	FAM255	CX-T-T-99-03	FAM255	137	288
TRIAL2	MB6	AB4	618	FAM255	CX-T-T-99-03	FAM255	137	275
TRIAL2	MB6	AB4	619	FAM255	CX-T-T-99-03	FAM255	137	275
TRIAL2	MB6	AB4	620	FAM236	CX-T-T-65-03	FAM236	128	286
TRIAL2	MB6	AB4	621	FAM236	CX-T-T-65-03	FAM236	114	275
TRIAL2	MB6	AB4	622	FAM236	CX-T-T-65-03	FAM236	121	293
TRIAL2	MB6	AB4	623	FAM296	CX-T-T-114-04	FAM296	135	264
TRIAL2	MB6	AB4	624	FAM296	CX-T-T-114-04	FAM296	131	272
TRIAL2	MB6	AB4	625	FAM296	CX-T-T-114-04	FAM296	131	278
TRIAL2	MB6	AB4	718	FAM245	CX-T-T-78-03	FAM245	134	293
TRIAL2	MB6	AB4	719	FAM245	CX-T-T-78-03	FAM245	135	293
TRIAL2	MB6	AB4	720	FAM245	CX-T-T-78-03	FAM245	135	286
TRIAL2	MB6	AB4	721	FAM285	CX-T-T-98-04	FAM285	114	278
TRIAL2	MB6	AB4	722	FAM285	CX-T-T-98-04	FAM285	121	275
TRIAL2	MB6	AB4	723	FAM285	CX-T-T-98-04	FAM285	117	275
TRIAL2	MB6	AB4	724	FAM246	CX-T-T-79-03	FAM246	135	281
TRIAL2	MB6	AB4	725	FAM246	CX-T-T-79-03	FAM246	132	278
TRIAL2	MB6	AB4	726	FAM246	CX-T-T-79-03	FAM246
TRIAL2	MB6	AB5	402	FAM300	CX-T-T-121-04	FAM300	135	288
TRIAL2	MB6	AB5	403	FAM300	CX-T-T-121-04	FAM300	136	286
TRIAL2	MB6	AB5	404	FAM300	CX-T-T-121-04	FAM300	137	288
TRIAL2	MB6	AB5	405	FAM247	CX-T-T-85-03	FAM247	114	275
TRIAL2	MB6	AB5	406	FAM247	CX-T-T-85-03	FAM247	113	275
TRIAL2	MB6	AB5	407	FAM247	CX-T-T-85-03	FAM247	134	293
TRIAL2	MB6	AB5	408	FAM295	CX-T-T-113-04	FAM295	133	272
TRIAL2	MB6	AB5	409	FAM295	CX-T-T-113-04	FAM295	131	286
TRIAL2	MB6	AB5	410	FAM295	CX-T-T-113-04	FAM295	131	288
TRIAL2	MB6	AB5	485	FAM212	CX-T-T-05-03	FAM212
TRIAL2	MB6	AB5	486	FAM212	CX-T-T-05-03	FAM212
TRIAL2	MB6	AB5	487	FAM212	CX-T-T-05-03	FAM212
TRIAL2	MB6	AB5	488	FAM222	CX-T-T-22-03	FAM222
TRIAL2	MB6	AB5	489	FAM222	CX-T-T-22-03	FAM222	135	275
TRIAL2	MB6	AB5	490	FAM222	CX-T-T-22-03	FAM222	133	293
TRIAL2	MB6	AB5	491	FAM215	CX-T-T-14-03	FAM215	134	278
TRIAL2	MB6	AB5	492	FAM215	CX-T-T-14-03	FAM215	135	293
TRIAL2	MB6	AB5	493	FAM215	CX-T-T-14-03	FAM215	133	286
TRIAL2	MB6	AB5	514	FAM244	CX-T-T-77-03	FAM244	114	278
TRIAL2	MB6	AB5	515	FAM244	CX-T-T-77-03	FAM244	131	272
TRIAL2	MB6	AB5	516	FAM244	CX-T-T-77-03	FAM244	134	293
TRIAL2	MB6	AB5	517	FAM288	CX-T-T-101-04	FAM288
TRIAL2	MB6	AB5	518	FAM288	CX-T-T-101-04	FAM288	114	286
TRIAL2	MB6	AB5	519	FAM288	CX-T-T-101-04	FAM288	128	278
TRIAL2	MB6	AB5	520	FAM238	CX-T-T-67-03	FAM238	131	278
TRIAL2	MB6	AB5	521	FAM238	CX-T-T-67-03	FAM238	115	293
TRIAL2	MB6	AB5	522	FAM238	CX-T-T-67-03	FAM238	119	293
TRIAL2	MB6	AB6	393		WD 3-5	WD 3-5	130	288
TRIAL2	MB6	AB6	394		WD 3-5	WD 3-5
TRIAL2	MB6	AB6	395		WD 3-5	WD 3-5	119	281
TRIAL2	MB6	AB6	396		WD 3-6	WD 3-6	133	268
TRIAL2	MB6	AB6	397		WD 3-6	WD 3-6
TRIAL2	MB6	AB6	398		WD 3-6	WD 3-6
TRIAL2	MB6	AB6	399		WD 3-6	WD 3-6	131	272
TRIAL2	MB6	AB6	400		WD 3-6	WD 3-6	121	293
TRIAL2	MB6	AB6	401		WD 3-6	WD 3-6
TRIAL2	MB6	AB6	494	FAM204	CX-T-T-36-02	FAM204	114	275
TRIAL2	MB6	AB6	495	FAM204	CX-T-T-36-02	FAM204	131	286
TRIAL2	MB6	AB6	496	FAM204	CX-T-T-36-02	FAM204	114	293
TRIAL2	MB6	AB6	497		WD 1	WD 1	131
TRIAL2	MB6	AB6	498		WD 1	WD 1
TRIAL2	MB6	AB6	499		WD 1	WD 1
TRIAL2	MB6	AB6	500	FAM279	CX-T-T-74-04	FAM279	133	278
TRIAL2	MB6	AB6	501	FAM279	CX-T-T-74-04	FAM279	130	286
TRIAL2	MB6	AB6	502	FAM279	CX-T-T-74-04	FAM279	135	275
TRIAL2	MB6	AB6	505	FAM240	CX-T-T-72-03	FAM240	133	275
TRIAL2	MB6	AB6	506	FAM240	CX-T-T-72-03	FAM240	133	269
TRIAL2	MB6	AB6	507	FAM240	CX-T-T-72-03	FAM240	134	293
TRIAL2	MB6	AB6	508	FAM216	CX-T-T-15-03	FAM216
TRIAL2	MB6	AB6	509	FAM216	CX-T-T-15-03	FAM216
TRIAL2	MB6	AB6	510	FAM216	CX-T-T-15-03	FAM216
TRIAL2	MB6	AB6	511	FAM241	CX-T-T-73-03	FAM241	131	272
TRIAL2	MB6	AB6	512	FAM241	CX-T-T-73-03	FAM241	131	286
TRIAL2	MB6	AB6	513	FAM241	CX-T-T-73-03	FAM241	135	293
TRIAL2	MB6	AB7	261		8097	8097	137	278
TRIAL2	MB6	AB7	262		8097	8097	134	272
TRIAL2	MB6	AB7	263		8097	8097
TRIAL2	MB6	AB7	264	FAM278	CX-T-T-73-04	FAM278	137	286
TRIAL2	MB6	AB7	265	FAM278	CX-T-T-73-04	FAM278	134	272
TRIAL2	MB6	AB7	266	FAM278	CX-T-T-73-04	FAM278	135	275
TRIAL2	MB6	AB7	267	FAM277	CX-T-T-72-04	FAM277
TRIAL2	MB6	AB7	268	FAM277	CX-T-T-72-04	FAM277
TRIAL2	MB6	AB7	269	FAM277	CX-T-T-72-04	FAM277	133	275
TRIAL2	MB6	AB7	290	FAM209	CX-T-T-01-03	FAM209
TRIAL2	MB6	AB7	291	FAM209	CX-T-T-01-03	FAM209
TRIAL2	MB6	AB7	292	FAM209	CX-T-T-01-03	FAM209
TRIAL2	MB6	AB7	293	FAM249	CX-T-T-93-03	FAM249	131	286
TRIAL2	MB6	AB7	294	FAM249	CX-T-T-93-03	FAM249	119	289
TRIAL2	MB6	AB7	295	FAM249	CX-T-T-93-03	FAM249	133	293
TRIAL2	MB6	AB7	296	FAM237	CX-T-T-66-03	FAM237	133	286
TRIAL2	MB6	AB7	297	FAM237	CX-T-T-66-03	FAM237	133	291
TRIAL2	MB6	AB7	298	FAM237	CX-T-T-66-03	FAM237	133	286
TRIAL2	MB6	AB7	373	FAM228	CX-T-T-48-03	FAM228	133	275
TRIAL2	MB6	AB7	374	FAM228	CX-T-T-48-03	FAM228	129	269
TRIAL2	MB6	AB7	375	FAM228	CX-T-T-48-03	FAM228	128	278
TRIAL2	MB6	AB7	376	FAM275	CX-T-T-69-04	FAM275	133	288
TRIAL2	MB6	AB7	377	FAM275	CX-T-T-69-04	FAM275
TRIAL2	MB6	AB7	378	FAM275	CX-T-T-69-04	FAM275	133	286
TRIAL2	MB6	AB7	379	FAM289	CX-T-T-102-04	FAM289	113	288
TRIAL2	MB6	AB7	380	FAM289	CX-T-T-102-04	FAM289	113	286
[truncated: 5,104 more rows]
